# Supplementary material for: Synthesis and the crystal structure of dimeric 1-hydroxyhexane-2,3-dione and the spectral characteristics of a model acireductone
Source: Royal Society of Chemistry journal article supplement (doi:10.1039/c6nj00562d), 2016-01-01
Supplement: c6nj00562d1.pdf [file c6nj00562d1.pdf]

## Electronic Supplementary Information (ESI)

*New Journal of Chemistry*

# Synthesis and crystal structure of dimeric 1-hydroxyhexane-2,3-dione and spectral characteristics of a model acireductone

Bartosz Trzewik,<sup>a\*</sup> Katarzyna Chruszcz-Lipska,<sup>b</sup> Anna Miłaczewska,<sup>c</sup> Joanna Opalińska-Piskorz,<sup>c</sup> Robert Karcz,<sup>c</sup> Robert Gryboś,<sup>c</sup> Marcin Oszejca,<sup>a</sup> Katarzyna Luberda-Durnaś,<sup>c</sup> Wiesław Łasocha,<sup>c</sup> Andy Fitch,<sup>d</sup> Bogdan Sulikowski<sup>c</sup> and Tomasz Borowski<sup>c\*</sup>

<sup>a</sup> Faculty of Chemistry, Jagiellonian University, ul. Romana Ingardena 3, 30-060 Kraków, Poland.  
Fax: +48 126340515; Tel: +48 126632297

<sup>b</sup> AGH University of Science and Technology, Faculty of Drilling, Oil and Gas, ul. Adama Mickiewicza 30, 30-059 Kraków, Poland.

<sup>c</sup> Jerzy Haber Institute of Catalysis and Surface Chemistry, Polish Academy of Sciences, ul. Niezapominajek 8, 30-239 Kraków, Poland. Fax: +48 12 4251923; Tel: +48 12 6395101

<sup>d</sup> European Synchrotron Radiation Facility, Avenue des Martyrs 71, Grenoble, France.

E-mail: [trzewik@chemia.uj.edu.pl](mailto:trzewik@chemia.uj.edu.pl); [ncborows@cyf-kr.edu.pl](mailto:ncborows@cyf-kr.edu.pl)

## Table of Contents

|        |                                                                                                                                                                                                                                              |  |     |
|--------|----------------------------------------------------------------------------------------------------------------------------------------------------------------------------------------------------------------------------------------------|--|-----|
| 1      | Detailed synthetic procedures for obtaining the compounds <b>2a</b> and <b>4a</b> .....                                                                                                                                                      |  | S3  |
| 1.1    | Hex-2-yn-1-ol <b>2a</b> .....                                                                                                                                                                                                                |  | S3  |
| 1.2    | 1-(Tetrahydro-2 <i>H</i> -pyran-2-ylloxy)hexane-2,3-dione <b>4a</b> ; IR and <sup>13</sup> C NMR spectra of <b>4a</b> .....                                                                                                                  |  | S4  |
| 2.     | <b>Fig. S1</b> The model accounting for hydrogen bonding contacts in the crystal of <b>6a</b> used to calculate the corrections to NMR isotropic shielding due to these interactions ....                                                    |  | S6  |
| 3      | <b>Fig. S2</b> Packing of molecules illustrating the presence of hydrophobic layers in the crystal structure of <b>6a</b> .....                                                                                                              |  | S7  |
| 4.     | <b>Fig. S3</b> Superimposed structures of the dimer <b>6a</b> molecules from the X-ray model and from the solid state DFT optimization .....                                                                                                 |  | S7  |
| 5.     | <b>Fig. S4</b> <sup>13</sup> C NMR spectrum of the dimer <b>6a</b> in CDCl <sub>3</sub> .....                                                                                                                                                |  | S8  |
| 6.     | <b>Fig. S5a–d</b> <sup>1</sup> H NMR spectrum of the dimer <b>6a</b> measured after dissolving in D <sub>2</sub> O ( <i>i.e.</i> the spectrum of <b>5a hydrate</b> ) .....                                                                   |  | S9  |
| 6.1    | <b>Fig. S5a</b> After 15 minutes .....                                                                                                                                                                                                       |  | S9  |
| 6.2    | <b>Fig. S5b</b> After 30 minutes .....                                                                                                                                                                                                       |  | S10 |
| 6.3    | <b>Fig. S5c</b> After 60 minutes .....                                                                                                                                                                                                       |  | S11 |
| 6.4    | <b>Fig. S5d</b> After 18 hours .....                                                                                                                                                                                                         |  | S12 |
| 7.     | <b>Fig. S6</b> <sup>13</sup> C NMR spectrum of the dimer <b>6a</b> ( <i>i.e.</i> <b>5a hydrate</b> ) in D <sub>2</sub> O .....                                                                                                               |  | S13 |
| 8.     | <b>Fig. S7</b> <sup>13</sup> C NMR spectrum of <b>5a</b> in CDCl <sub>3</sub> .....                                                                                                                                                          |  | S14 |
| 9.     | <b>Table S1</b> Harmonic frequencies, infrared intensities, Raman scattering activities and intensities, and Potential Energy Distributions (PEDs) of normal modes for <b>6a</b> calculated at B3LYP/cc-pVTZ level .....                     |  | S14 |
| 10.    | <b>Table S2</b> Definitions of internal coordinates used in the normal analysis of <b>6a</b> in GAR2PED program .....                                                                                                                        |  | S18 |
| 11.    | <b>Table S3</b> Titration of pre-heated aqueous solution of <b>5a hydrate</b> with KOH ( <b>Fig. 7</b> ). Details of preparing the solutions .....                                                                                           |  | S21 |
| 12.    | <b>Fig. S8a–c</b> Regression curves for the titrations ( <b>Fig. 7</b> ) .....                                                                                                                                                               |  | S22 |
| 12.1   | <b>Fig. S8a</b> Regression curves for the acidic and the basic forms ( <b>II</b> and <b>II</b> <sup>-</sup> ) .....                                                                                                                          |  | S22 |
| 12.1.1 | <b>Fig. S8a (I)</b> <i>Series I</i> .....                                                                                                                                                                                                    |  | S22 |
| 12.1.2 | <b>Fig. S8a (II)</b> <i>Series II</i> .....                                                                                                                                                                                                  |  | S23 |
| 12.1.3 | <b>Fig. S8a (III)</b> <i>Series III</i> .....                                                                                                                                                                                                |  | S24 |
| 12.2   | <b>Fig. S8b</b> Regression curves for the dianionic form ( <b>II</b> <sup>-</sup> ) .....                                                                                                                                                    |  | S25 |
| 12.2.1 | <b>Fig. S8b (I)</b> <i>Series I</i> .....                                                                                                                                                                                                    |  | S25 |
| 12.2.2 | <b>Fig. S8b (II)</b> <i>Series II</i> .....                                                                                                                                                                                                  |  | S25 |
| 12.2.3 | <b>Fig. S8b (III)</b> <i>Series III</i> .....                                                                                                                                                                                                |  | S25 |
| 12.3   | <b>Fig. S8c</b> Regression curves for <b>5a hydrate</b> .....                                                                                                                                                                                |  | S26 |
| 12.3.1 | <b>Fig. S8c (I)</b> <i>Series I</i> .....                                                                                                                                                                                                    |  | S26 |
| 12.3.2 | <b>Fig. S8c (II)</b> <i>Series II</i> .....                                                                                                                                                                                                  |  | S26 |
| 12.3.3 | <b>Fig. S8c (III)</b> <i>Series III</i> .....                                                                                                                                                                                                |  | S26 |
| 13.    | <b>Fig. S9</b> Contours of key molecular KS orbitals for intense low-energy electronic transitions of various forms of the compound <b>II</b> ( <b>5a hydrate</b> , <b>II</b> , <b>II</b> <sup>-</sup> , and <b>II</b> <sup>2-</sup> ) ..... |  | S27 |
| 14.    | <b>Fig. S10</b> <sup>13</sup> C NMR spectrum of 50 mM <b>6a</b> in 50 Mm Kp <sub>i</sub> at pH > 7, after 3 h at 20°C in aerobic atmosphere .....                                                                                            |  | S28 |
| 15.    | <b>Fig. S11</b> <sup>13</sup> C NMR spectrum of 70 mM <b>6a</b> in 50 Mm Kp <sub>i</sub> , after 3 h at 20°C in aerobic atmosphere .....                                                                                                     |  | S29 |
| 16.    | <b>Fig. S12</b> <sup>1</sup> H NMR spectrum of 0.01 M <b>6a</b> in 1 M Kp <sub>i</sub> , after 90 min at 20°C .....                                                                                                                          |  | S30 |

## 1. Detailed synthetic procedures for obtaining the compounds 2a and 4a

### 1.1 Hex-2-yn-1-ol (2a)<sup>[Ref. S1]</sup> C<sub>6</sub>H<sub>10</sub>O, M = 98.14

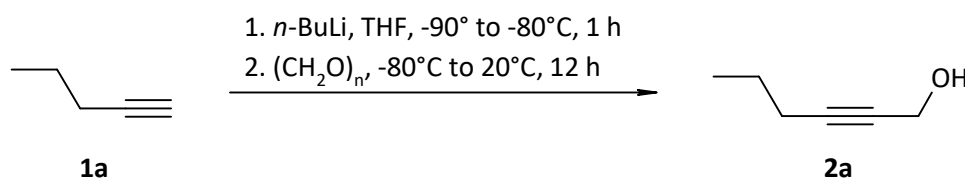

Although hex-2-yn-1-ol **2a** is commercially available, we decided to obtain it from cheaper pent-1-yne. A modification of the method by Peng, Yu, and Zhang<sup>[Ref. S1]</sup> allowed us to get **2a** in a scale of up to about thirty grams. To a solution of **1a** (25 g, 36.2 cm<sup>3</sup>, 0.367 mol) in anhydrous [Note S1] THF (200 cm<sup>3</sup>) [Note S2] *n*-BuLi (2.5 M solution in hexanes) [Note S3] (161 cm<sup>3</sup>, 0.404 mol, 1.1 equiv.) was added dropwise [Note S4] with a syringe by a septum at between -90°C to -80°C [Note S5] under Ar, with intense mixing on a magnetic stirrer. Upon the addition of *n*-BuLi the mixture become more and more thick because white alkyne lithium salt started to precipitate. The reaction mixture was stirred at the same temperature for 15 min before the addition of (CH<sub>2</sub>O)<sub>n</sub> (1.2 equiv.) [Note S6]. The resulting mixture was allowed to warm to room temperature gradually [Note S7] and stirred for around 12 h [Note S8] before quenched with NH<sub>4</sub>Cl saturated aqueous solution. The mixture was extracted twice with Et<sub>2</sub>O. The combined organic phases were dried over anhydrous MgSO<sub>4</sub> for 15 min and filtered. The filtrate was concentrated on a rotary evaporator [Note S9], and the light yellow residue was distilled under reduced pressure [Note S10] to give clean [Note S11] **2a** as colourless liquid.

[Ref. S1] Y. Peng, M. Yu and L. Zhang, *Org. Lett.*, 2008, **10**, 5187.

[Note S1] Boiling commercially available THF over CaH<sub>2</sub> in Ar atmosphere for 4 h and distilling it prior to the use was sufficient.

[Note S2] Increasing the concentration of pent-1-yne **1a** to 1.55 M reduced the amount of anhydrous THF needed for the reaction. We do not exclude the possibility that the concentration of the alkyne could be even greater.

[Note S3] We found that *n*-BuLi in concentration as high as 2.5 M can be used with no harm to the reaction, which reduced the amount of the solution. Although handling *n*-BuLi solutions can be dangerous, small amounts of 2.5 M *n*-BuLi solution in hexanes practically never auto-ignite in air – more concentrated solutions may require more care.

[Note S4] A volume of 161 cm<sup>3</sup> is a quite large amount – adding with a syringe takes a time of about an hour.

[Note S5] A Dewar bath filled with acetone frozen by mixing it with an excess of liquid nitrogen was used. Such mixture let reach and maintain temperature as low as even -100°C by continuous adding the nitrogen. It is advisable not to rise the temperature of the reaction above -75°C by adjusting the rate of adding the *n*-BuLi solution. Higher temperatures lower the yield of **2a**.

[Note S6] Reagent grade paraformaldehyde was used as received.

[Note S7] We strongly advise to leave the mixture in the Dewar bath and let it warm slowly. Removing the bath results in a rapid rise of temperature – the mixture can even start to boil. It did not seem, however, to have a great impact on the yield of **2a**.

[Note S8] Peng, Yu, and Zhang left the mixture for 2 h only. Overnight mixing at ambient temperature allows, in our opinion, the reaction to complete. From the other hand, further extending this time makes the mixture yellow and then brownish and lowers the yield of **2a**.

[Note S9] The compound **2a** has a pungent odor. Using a vapor trap is advisable.

[Note S10] The distillation proceeds smoothly, giving **2a** in a narrow range of temperature. No heads were collected and the residue was very small.

[Note S11] Purity of **2a** is very close to 100%, which can be easily determined by gas chromatography.

1.2 1-(Tetrahydro-2H-pyran-2-yloxy)hexane-2,3-dione (4a) <sup>[Ref. S2]</sup> C<sub>11</sub>H<sub>18</sub>O<sub>4</sub>, M = 214.26

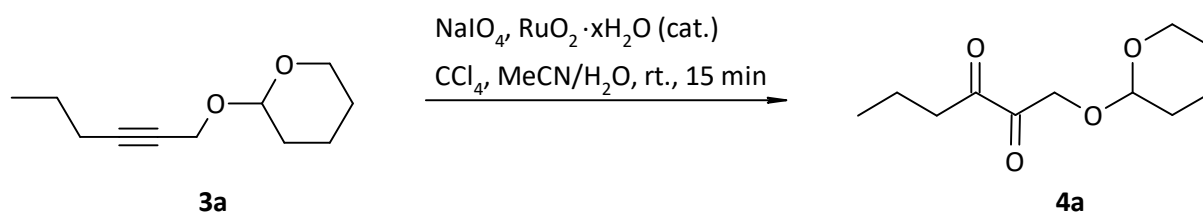

Oxidation of 2-(hex-2-yn-1-yloxy)tetrahydro-2H-pyran **3a** to 1-(tetrahydro-2H-pyran-2-yloxy)hexane-2,3-dione **4a** was performed by a slightly modified method by *Zibuck and Seebach*.<sup>[Ref. S2]</sup> It was found that the scale of the reaction can be enlarged by a factor of 10, to 30 mmol of the substrate, without a negative impact on the yield of the product. Thus, 2-(hex-1-yn-1-yloxy)tetrahydro-2H-pyran **3** (5.47 g, 30 mmol) was dissolved in a mixture of carbon tetrachloride (140 cm<sup>3</sup>) and acetonitrile (140 cm<sup>3</sup>). Separately a solution of NaIO<sub>4</sub> (19.25 g, 90 mmol) [Notes S12, S13] in water (210 cm<sup>3</sup>) was prepared. The solutions were intensely mixed together in a 1000 cm<sup>3</sup> round-bottom flask with a big magnetic stirrer for 5 min. [Note S14] To the resulting emulsion a catalytic amount of RuO<sub>2</sub>·xH<sub>2</sub>O [Note S15] (0.118 g, 0.5 mmol) [Note S16] was added. CAUTION: The work-up of the reaction mixture should be performed as fast as possible and purification of the product should be carried out immediately. The mixture turned black immediately and then, within 1–2 minutes, the colour of it changed to grass-green and the temperature of the mixture rose to about 40°C. (If instead of NaIO<sub>4</sub> one uses KIO<sub>4</sub> the mixture can remain black and the rise of temperature is hardly observed). The mixture became gradually yellow-green and more and more white precipitate of NaIO<sub>3</sub> formed, and, after 15 min, the reaction was stopped by adding water (100 cm<sup>3</sup>) [Note S17] and immediate separating the lower organic layer – which turns black – from the upper, which remains only slightly coloured. The aqueous layer was extracted with DCM (3 × 50 cm<sup>3</sup>) – the extracts can be slightly coloured by small amounts of I<sub>2</sub> that can form during the reaction. If this happens, the iodine should be carefully separated during the column chromatography (CC). During the extraction the aqueous layer sometimes become black – the extracts were only slightly coloured. The combined dark coloured organic layers were quickly (10 min) dried over anhydrous MgSO<sub>4</sub> [Note S18], filtered through blotting paper (do not filter through Celite! [Note S19]) – the filtrate is clear and yellow-brown (sometimes green or even black) coloured – and concentrated on a rotary evaporator. CAUTION: Rising the temperature of the water bath over 60°C resulted in a considerable loss of the product by its thermal decomposition [Note S20], especially if it is contaminated by iodine. The remaining yellow-brown (sometimes dark green or black) oil was immediately chromatographed on silica gel (60 Å, 230–400 mesh ATSM) for CC. Mixture of CHCl<sub>3</sub> and MeOH (30:1 v/v) was used as eluent. 50 g of silica gel was used and the working length of the column was 45 cm. The process was conducted under small over-pressure, but not so fast as flash chromatography. All dark ruthenium compounds remained on the start and the canary-yellow coloured

**4a** went in the first fraction [Note S21]. Prolonged evaporation of the solution after the chromatography led to darkening and partial decomposition of the product.

[Ref. S2] R. Zibuck and D. Seebach, *Helv. Chim. Acta*, 1988, **71**, 237.

[Note S12] The authors used 4.2 eqs of NaIO<sub>4</sub> but it was found that it was enough to use only 3 eqs (maybe even less would do).

[Note S13] KIO<sub>4</sub> can be used instead of NaIO<sub>4</sub>. Even though KIO<sub>4</sub> is less soluble in water from NaIO<sub>4</sub>, KIO<sub>3</sub> is *more* soluble than NaIO<sub>3</sub>, so the overall amount of water (used to dissolve the periodate and added after the reaction) remained more or less the same.

[Note S14] On stopping the stirring two almost clear layers form within several minutes.

[Note S15] RuO<sub>2</sub>·xH<sub>2</sub>O was provided by Sigma-Aldrich. They stated that the minimal concentration of Ru in the product was 44% so the value of x is equal to about 5.5.

[Note S16] Calculated for the formula RuO<sub>2</sub>·5.5H<sub>2</sub>O.

[Note S17] Zibuck and Seebach used much more water; for the 30 mmol scale it would be 750 cm<sup>3</sup>. However, 100 cm<sup>3</sup> of water was enough to dissolve all the precipitate of NaIO<sub>3</sub>.

[Note S18] It was found that a prolonged contact with solid MgSO<sub>4</sub> (or a contact with the remains of RuO<sub>2</sub>·xH<sub>2</sub>O) caused gradual decomposition of the product.

[Note S19] Filtering the crude product solution through Celite in order to remove both insoluble and soluble ruthenium compounds resulted in a complete loss of the product!

[Note S20] Moreover the decomposition products were extremely difficult to be separated from **4a** during the CC.

[Note S21] In case of the contamination with I<sub>2</sub> it is advisable to collect only the main part of the first canary-yellow colored fraction containing **4a**. The tail of the fraction (dirty-yellow or dirty-greenish) contains iodine and other contaminants. It is sometimes difficult to distinguish between the fractions – control the process using thin layer chromatography.

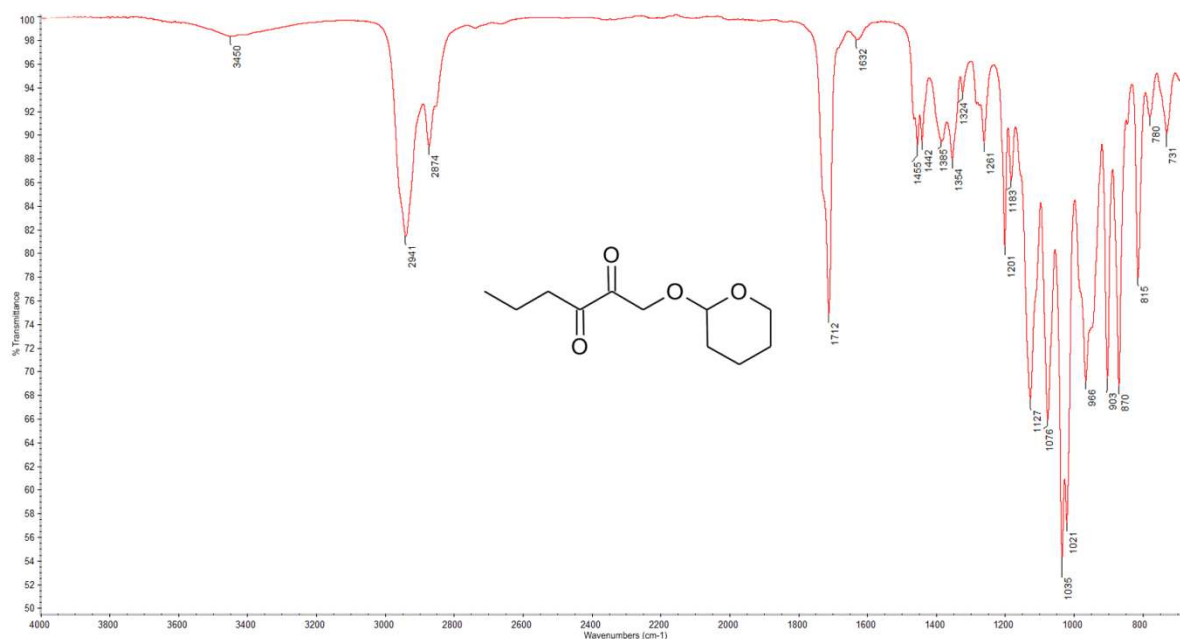

FT-IR ATR spectrum of **4a**.

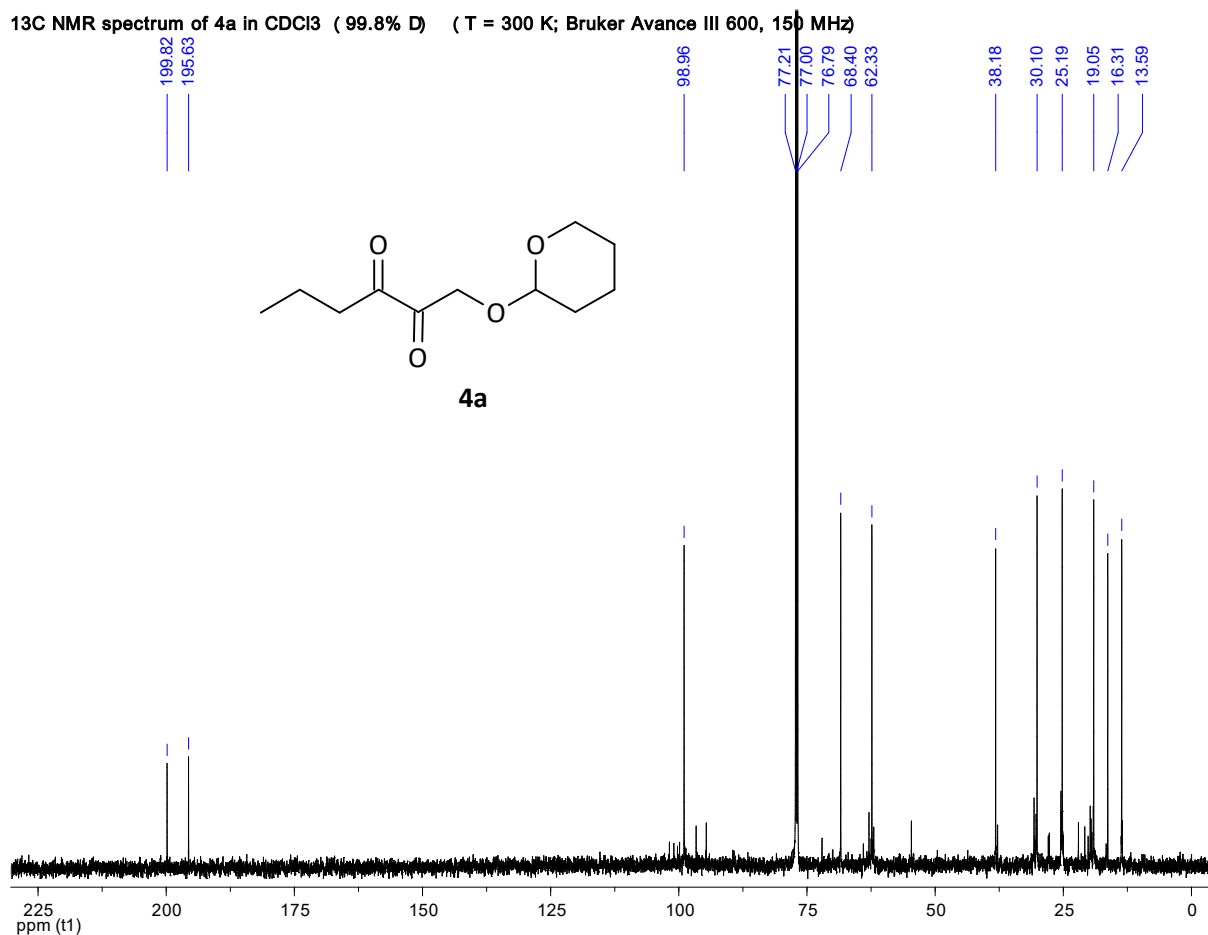

$^{13}\text{C}$  NMR spectrum of **4a** in  $\text{CDCl}_3$ .

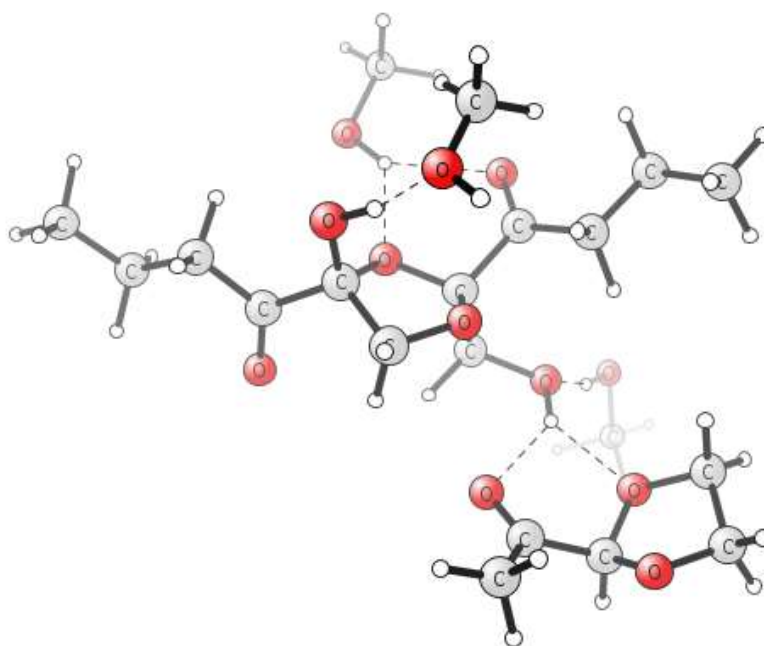

Fig. S1 The model accounting for hydrogen bonding contacts in the crystal of **6a** used to calculate the corrections to NMR isotropic shielding due to these interactions. Hydrogen bonds are marked with dashed lines.

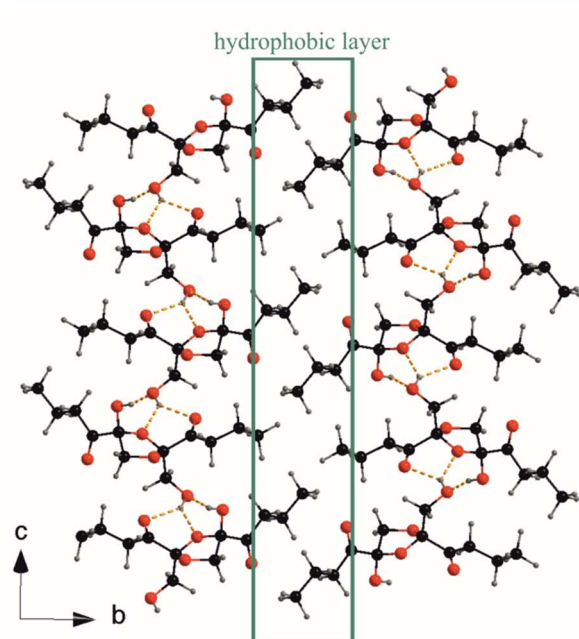

Fig. S2 Packing of molecules illustrating the presence of hydrophobic layers in the crystal structure of **6a**.

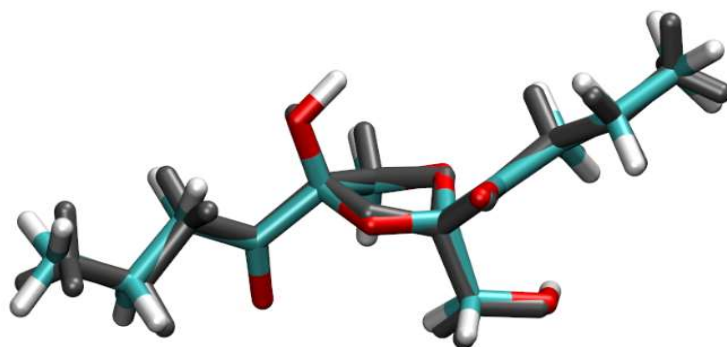

Fig. S3 Superimposed structures of the dimer **6a** molecules from the X-ray model (in gray) and from the solid state DFT optimization.

**<sup>13</sup>C NMR spectrum of 6a in CDCl<sub>3</sub> (99.8% D) (20.8 mg/0.8 cm<sup>3</sup>; c = 0.2 mol dm<sup>-3</sup>; T = 300 K; Bruker Avance III 600, 150 MHz)**

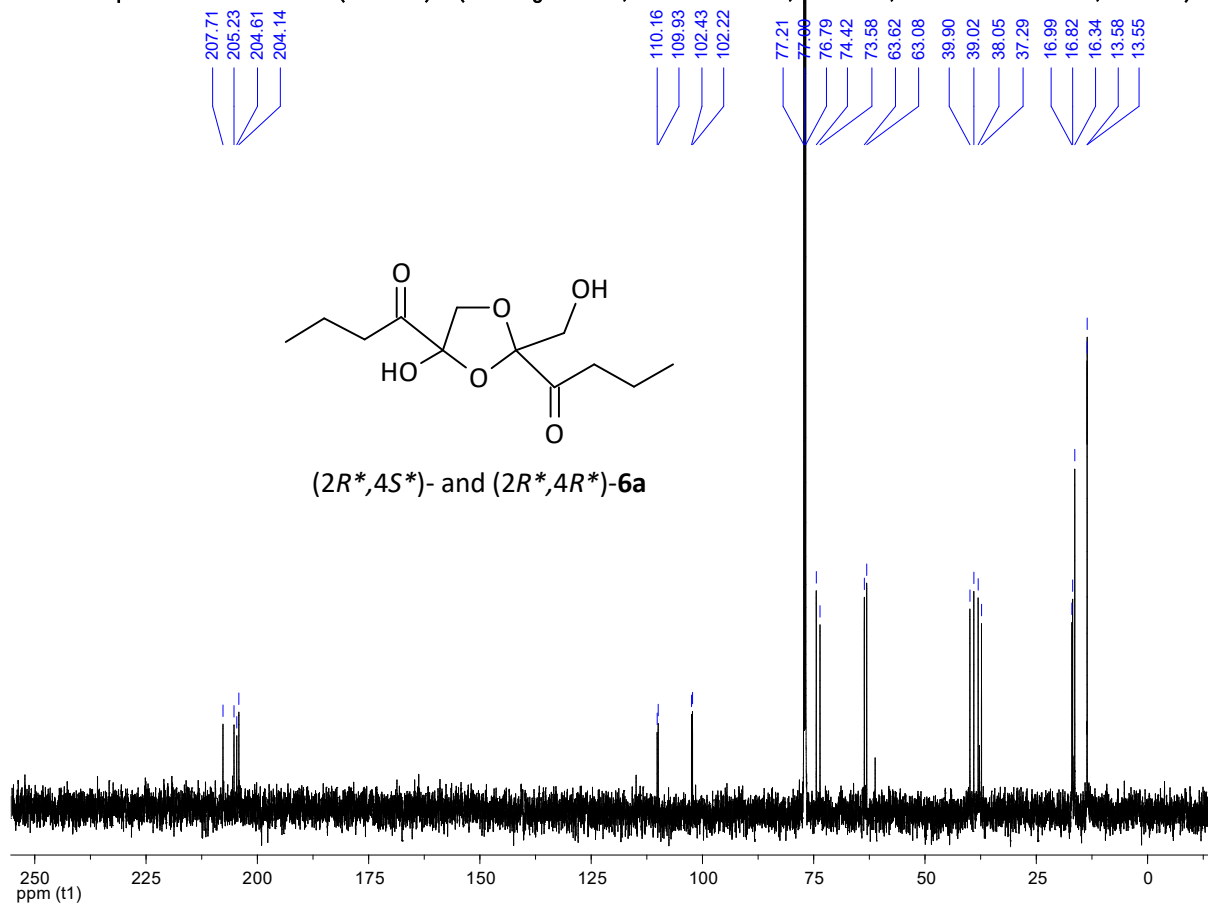

Fig S4 <sup>13</sup>C NMR spectrum of the dimer **6a** in CDCl<sub>3</sub>.



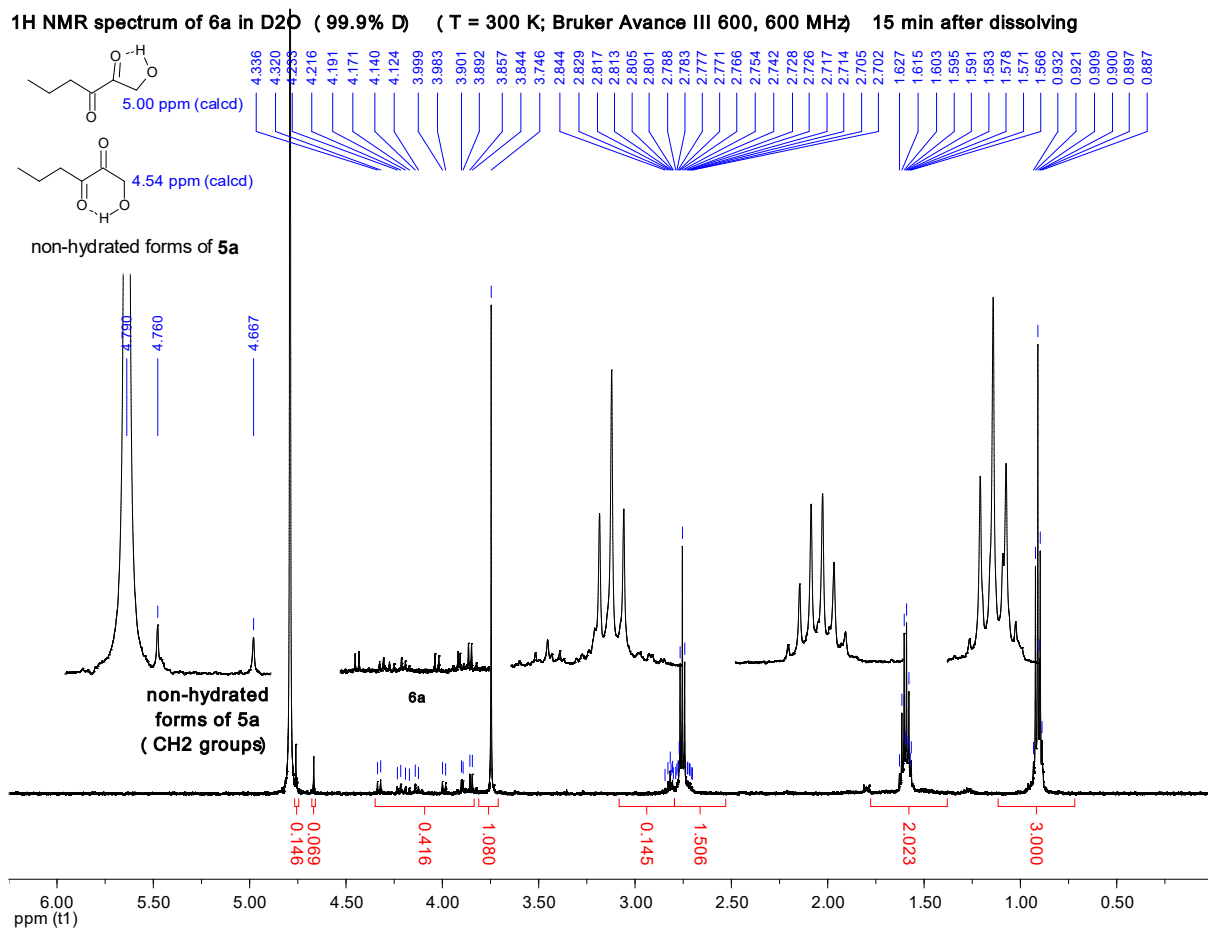

Fig. S5a <sup>1</sup>H NMR spectrum of the dimer **6a** measured 15 min after dissolving in D<sub>2</sub>O. The sample contains mostly **5a hydrate**, but residual signals from **6a** between 4.40–3.80 ppm are visible. A singlet at 3.75 ppm comes from the CH<sub>2</sub>OH group in the molecules of the major form of **5a hydrate**; the two minor form (probably **free, non-hydrated 5a** in various molecular geometries) are responsible for the singlets at 4.76 and 4.67 ppm. The alkyl signals from **5a hydrate** and **free 5a** are partially resolved; the residual signals from **6a** alkyl groups make the signals ragged. On the basis of the calculations, two low-energy forms of **free 5a**, differing in a position of a hydrogen bond, could be proposed, which give singlets from their CH<sub>2</sub>OH groups. Their formulae are shown in the spectrum.

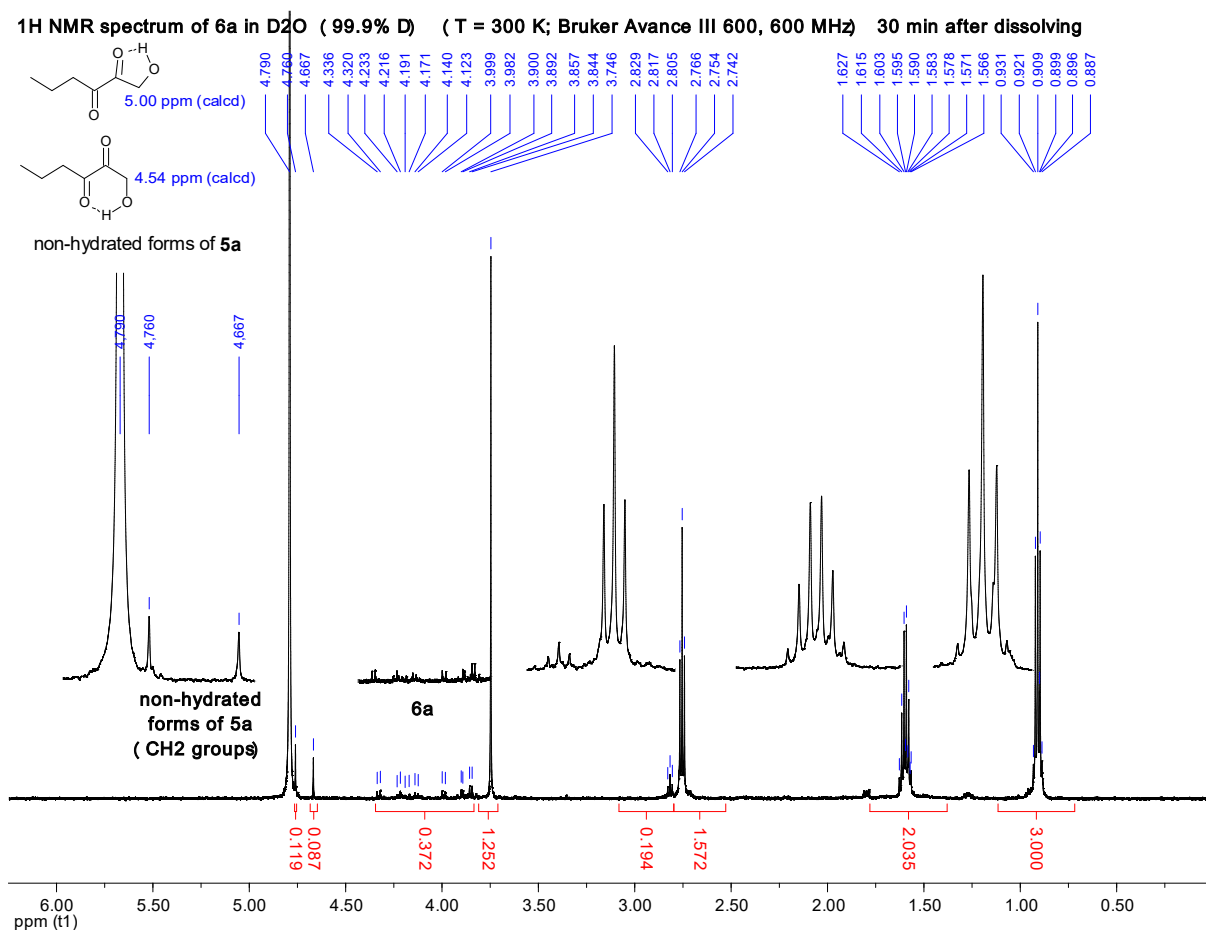

Fig. S5b <sup>1</sup>H NMR spectrum of the dimer **6a** measured 30 min after dissolving in D<sub>2</sub>O. The sample contains mostly **5a hydrate**, but residual signals from **6a** between 4.40–3.80 ppm are visible. A singlet at 3.75 ppm comes from the CH<sub>2</sub>OH group in the molecules of the major form of **5a hydrate**; the two minor form (probably **free, non-hydrated 5a** in various molecular geometries) are responsible for the singlets at 4.76 and 4.67 ppm. The alkyl signals from **5a hydrate** and **free 5a** are partially resolved; the residual signals from **6a** alkyl groups make the signals ragged. On the basis of the calculations, two low-energy forms of **free 5a**, differing in a position of a hydrogen bond, could be proposed, which give singlets from their CH<sub>2</sub>OH groups. Their formulae are shown in the spectrum.

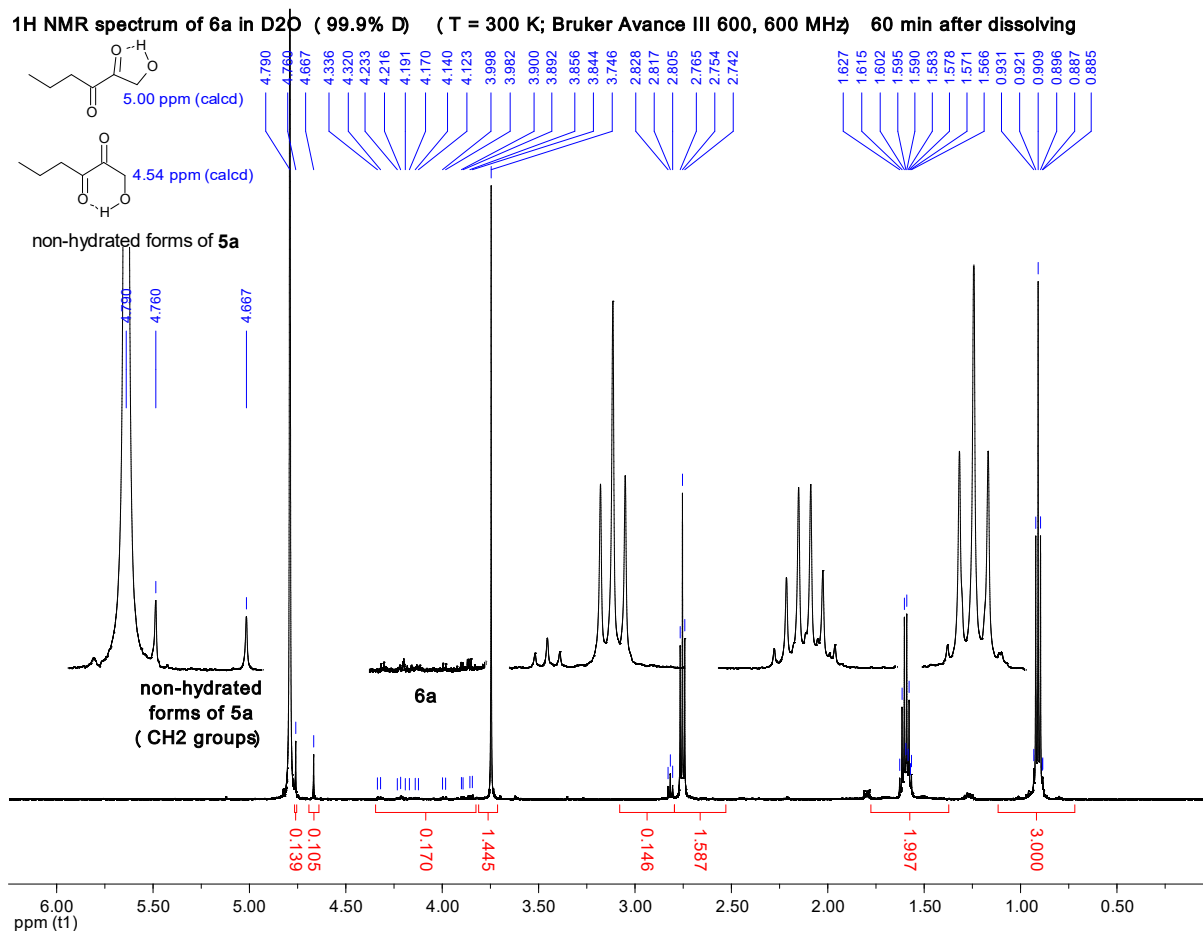

Fig. S5c  $^1H$  NMR spectrum of the dimer **6a** measured 60 min after dissolving in  $D_2O$ . The sample contains mostly **5a hydrate**; residual signals from **6a** between 4.40–3.80 ppm can practically be neglected. A singlet at 3.75 ppm comes from the  $CH_2OH$  group in the molecules of the major form of **5a hydrate**; the two minor form (probably **free, non-hydrated 5a** in various molecular geometries) are responsible for the singlets at 4.76 and 4.67 ppm. Alkyl signals from **5a hydrate** and **free 5a** are partially resolved and smooth. On the basis of the calculations, two low-energy forms of **free 5a**, differing in a position of a hydrogen bond, could be proposed, which give singlets from their  $CH_2OH$  groups. Their formulae are shown in the spectrum.

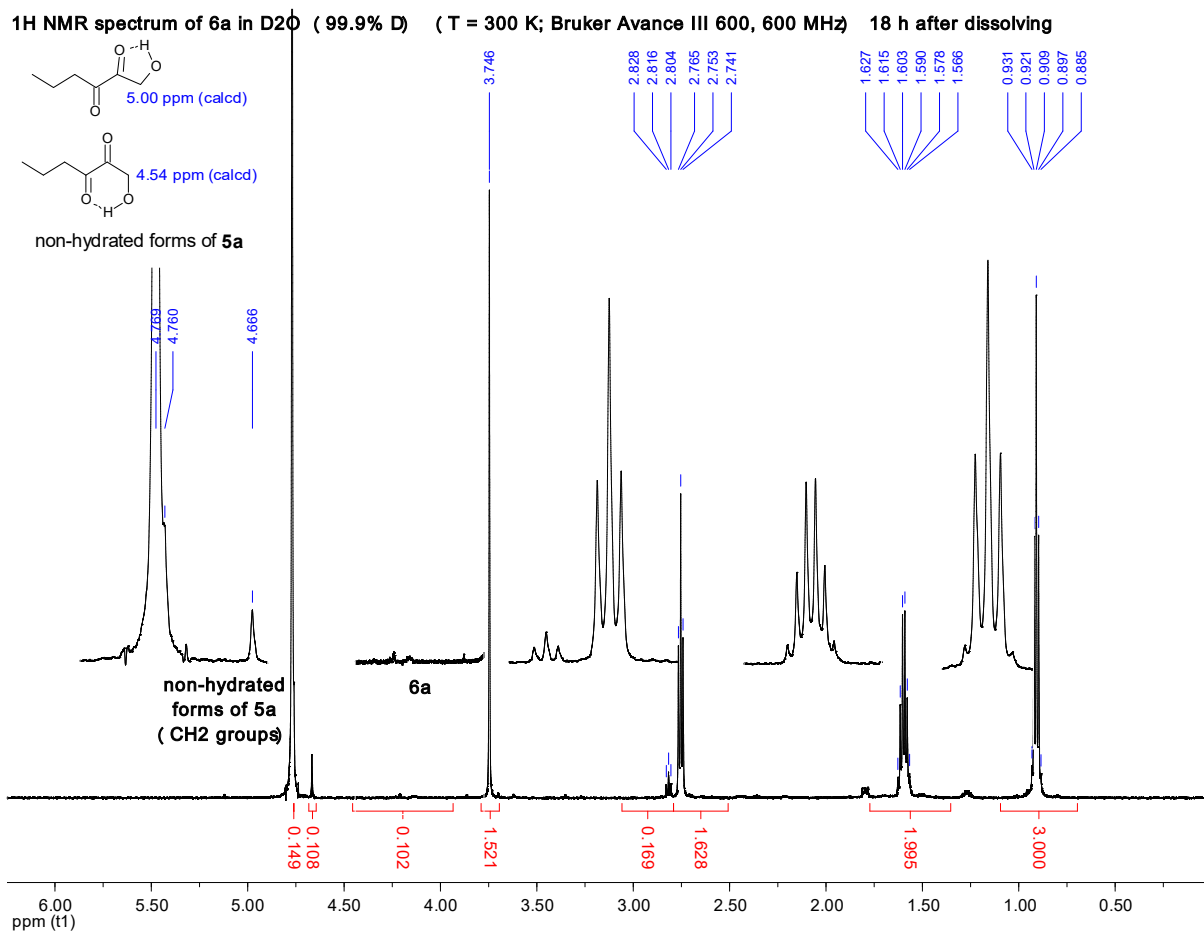

Fig. S5d <sup>1</sup>H NMR spectrum of the dimer **6a** measured 18 h after dissolving in D<sub>2</sub>O (the signal of which was locked at 4.77 ppm instead of the proper value of 4.79 ppm). The sample contains mostly **5a hydrate**; residual signals from **6a** between 4.40–3.80 ppm are practically invisible. A singlet at 3.75 ppm comes from the CH<sub>2</sub>OH group in the molecules of the major form of **5a hydrate**; the two minor form (probably **free, non-hydrated 5a** in various molecular geometries) are responsible for the singlets at 4.76 and 4.67 ppm. Alkyl signals from **5a hydrate** and **free 5a** are partially resolved and smooth. On the basis of the calculations, two low-energy forms of **free 5a**, differing in a position of a hydrogen bond, could be proposed, which give singlets from their CH<sub>2</sub>OH groups. Their formulae are shown in the spectrum.

**<sup>13</sup>C NMR spectrum of 6a in D<sub>2</sub>O (99.9% D) (10,4 mg/0,8 cm<sup>3</sup>; T = 300 K; Bruker Avance III 600, 150 MHz)**

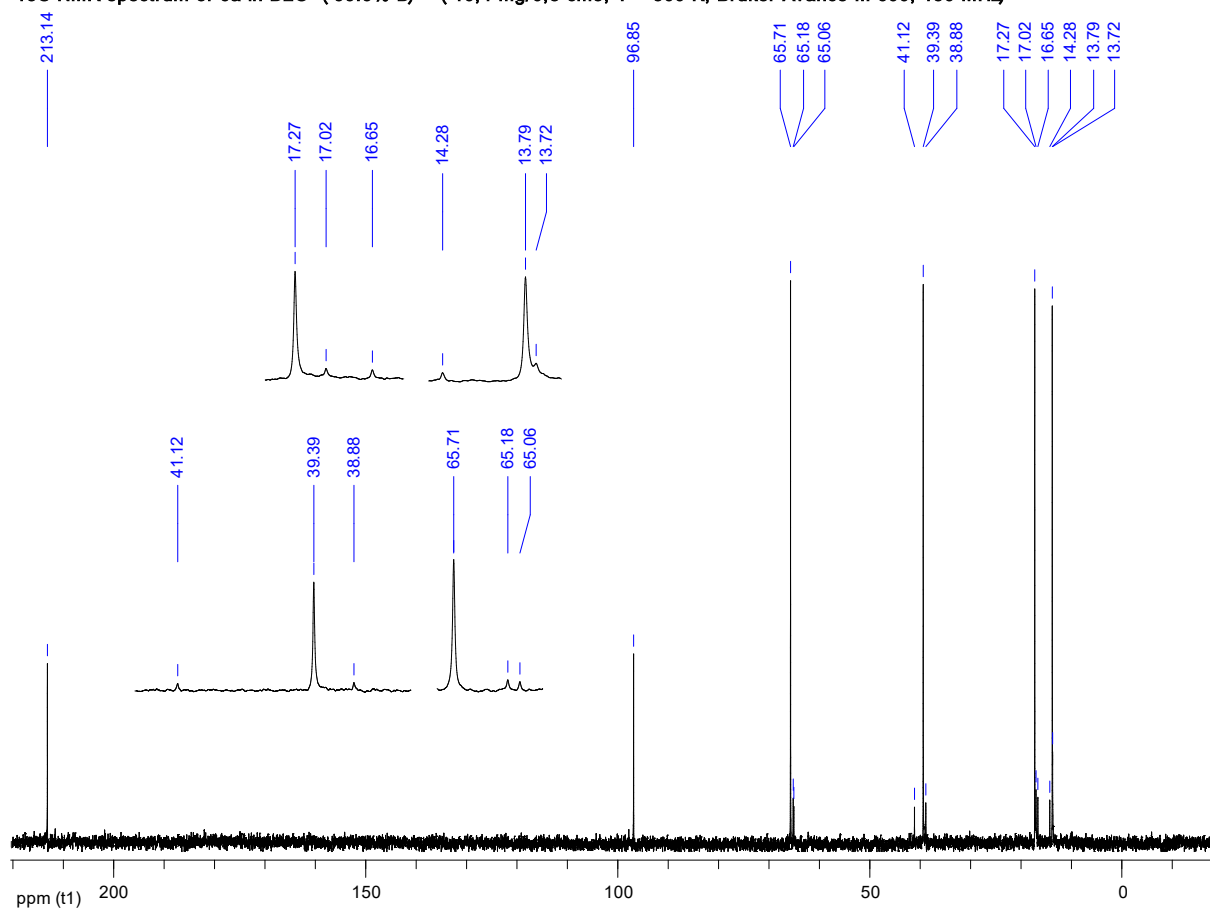

Fig. S6 <sup>13</sup>C NMR spectrum of the dimer **6a** (*i.e.* **5a hydrate**) in D<sub>2</sub>O. All the alkyl regions contain small signals coming from **non-hydrated** *minor* forms of **5a**.

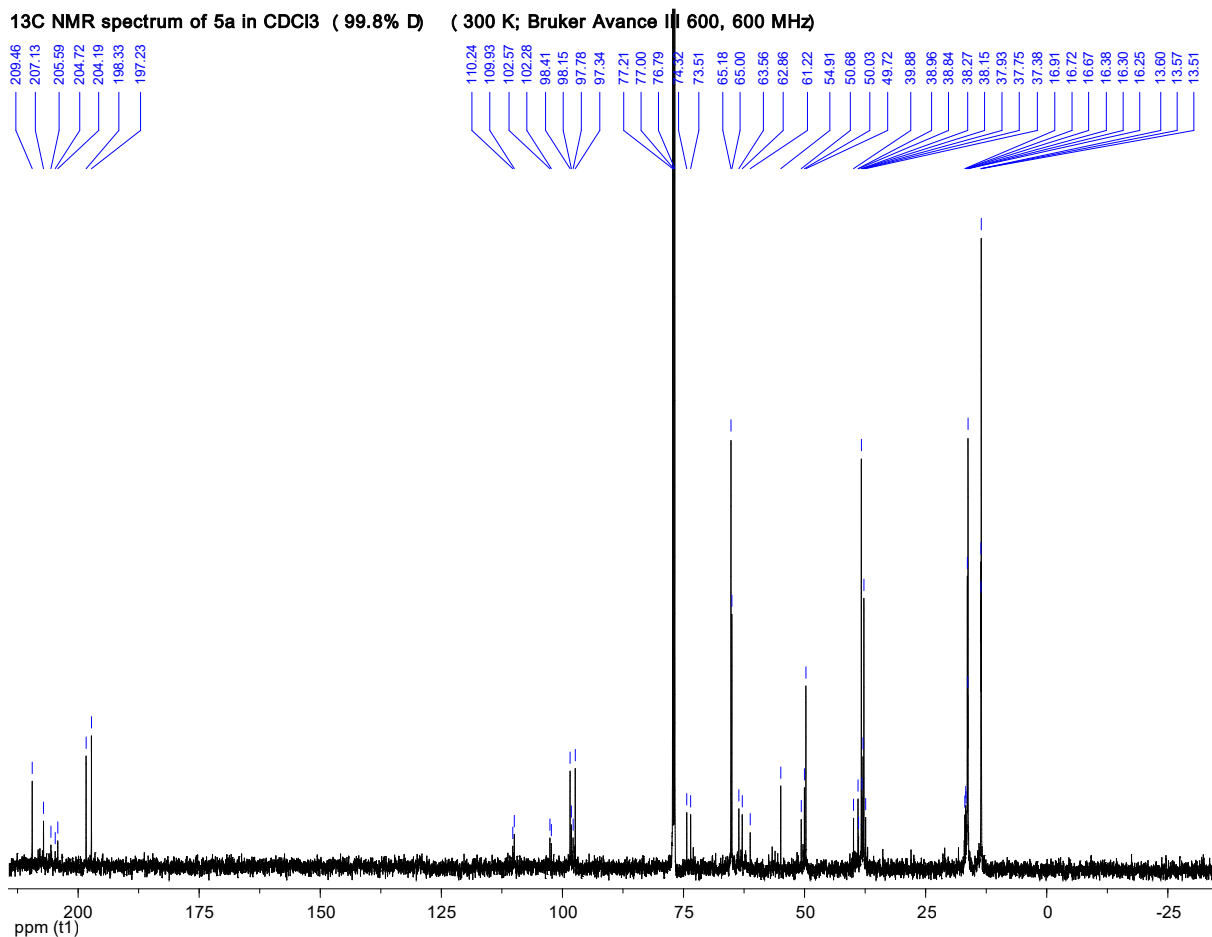

Fig. S7 <sup>13</sup>C NMR spectrum of **5a** in CDCl<sub>3</sub>. Signals from **5a hydrate**, from the **free forms of 5a**, and from both diastereomers of **6a** are visible in the spectrum.

Table S1 Harmonic frequencies, infrared intensities, Raman scattering activities and intensities, and Potential Energy Distributions (PEDs) of normal modes for **6a** calculated at the B3LYP/cc-pVTZ level. Frequencies are scaled by the factor of 0.965, PEDs of vibrations (in %) are given in brackets (only PEDs > 5% are included)

| No. | Freq. /cm <sup>-1</sup> | Freq. Scal /cm <sup>-1</sup> | IR intensity /km·mol <sup>-1</sup> | Raman activity /Å <sup>4</sup> a.u. <sup>-1</sup> | Raman intensity /a.u. | PED ( <i>contributions</i> > 5%)                                                                                                                                                        |
|-----|-------------------------|------------------------------|------------------------------------|---------------------------------------------------|-----------------------|-----------------------------------------------------------------------------------------------------------------------------------------------------------------------------------------|
| 1   | 20.7                    | 20.0                         | 0.46                               | 0.44                                              | 170.66                | $\tau_{C_{10}C_{11}}$ [34], $\tau_{C_{10}C_9}$ [12], $\tau_{C_2C_3}$ [7], $\delta_{C_{11}C_{10}O_5}$ [5], $\omega_{out}C_{10}C_{11}$ [5]                                                |
| 2   | 27.3                    | 26.4                         | 1.79                               | 0.65                                              | 190.25                | $\tau_{C_{10}C_{11}}$ [29], $\tau_{C_3C_4}$ [17], $\tau_{C_{10}C_9}$ [14], $\tau_{C_5C_4}$ [9], $\tau_{C_{11}O_5}$ [8], $\delta_{C_{11}C_{10}O_5}$ [6], $\omega_{out}C_{10}C_{11}$ [5]  |
| 3   | 42.6                    | 41.1                         | 0.60                               | 0.27                                              | 50.11                 | $\tau_{C_5C_4}$ [26], $\tau_{C_{11}O_5}$ [24], $\tau_{C_2C_3}$ [16]                                                                                                                     |
| 4   | 56.0                    | 54.0                         | 0.53                               | 0.44                                              | 61.48                 | $\tau_{C_{10}C_9}$ [20], $\tau_{C_3C_4}$ [20], $\tau_{C_{10}C_{11}}$ [12], $\omega_{out}C_{10}C_{11}$ [8], $\tau_{C_5C_4}$ [5]                                                          |
| 5   | 72.3                    | 69.8                         | 0.78                               | 0.10                                              | 10.31                 | $\tau_{C_3C_4}$ [20], $\tau_{C_2C_3}$ [19], $\tau_{2/R_5}$ [18], $\tau_{C_5C_4}$ [5]                                                                                                    |
| 6   | 83.4                    | 80.5                         | 2.19                               | 0.16                                              | 14.71                 | $\rho_{C_4C_3}$ [17], $\delta_2C_3H_6H_7$ [13], $\tau_{C_{11}O_5}$ [8], $\tau_{C_6C_5}$ [8], $\tau_{1/R_5}$ [7]                                                                         |
| 7   | 98.4                    | 95.0                         | 1.95                               | 0.17                                              | 13.20                 | $\tau_{C_6C_5}$ [59], $\delta_2C_6H_8H_9$ [10], $\tau_{C_6O_1}$ [9]                                                                                                                     |
| 8   | 106.7                   | 103.0                        | 0.61                               | 0.21                                              | 14.99                 | $\tau_{1/R_5}$ [14], $\delta_{C_5C_6C_4}$ [10], $\tau_{C_{10}C_9}$ [9], $\delta_2C_3H_6H_7$ [9]                                                                                         |
| 9   | 121.9                   | 117.6                        | 1.54                               | 0.38                                              | 23.94                 | $\tau_{C_{10}C_9}$ [67], $\tau_{C_8C_9}$ [12], $\tau_{C_{10}C_{11}}$ [7]                                                                                                                |
| 10  | 131.0                   | 126.4                        | 1.16                               | 0.05                                              | 3.09                  | $\tau_{C_3C_4}$ [64], $\rho_{C_3H_6H_7}$ [14], $\tau_{C_5C_4}$ [6]                                                                                                                      |
| 11  | 151.1                   | 145.8                        | 1.88                               | 0.23                                              | 11.61                 | $\delta_2C_9H_{17}H_{16}$ [20], $\delta_2C_8H_{14}H_{15}$ [12], $\tau_{2/R_5}$ [11], $\tau_{1/R_5}$ [10], $\beta_{C_9C_{10}O_6}$ [9], $\rho_{C_{10}C_{11}}$ [6], $\tau_{C_{11}O_5}$ [6] |

Table S1 (continued)

| No. | Freq.<br>/cm <sup>-1</sup> | Freq.<br>Scal<br>/cm <sup>-1</sup> | IR intensity<br>/km·mol <sup>-1</sup> | Raman<br>activity<br>/Å <sup>4</sup> ·a.u. <sup>-1</sup> | Raman<br>intensity<br>/a.u. | PED (contributions > 5%)                                                                                                                                                                                             |
|-----|----------------------------|------------------------------------|---------------------------------------|----------------------------------------------------------|-----------------------------|----------------------------------------------------------------------------------------------------------------------------------------------------------------------------------------------------------------------|
| 12  | 182.7                      | 176.3                              | 3.55                                  | 1.07                                                     | 44.01                       | $\tau_{1/R5}$ [18], $\rho_{C_{11}C_{10}O_5}$ [10], $\delta_2C_9H_{17}H_{16}$ [8], $\tau_{C_8C_9}$ [7], $\tau_{C_{11}C_{10}O_5}$ [7], $\tau_{C_5C_6C_4}$ [5], $\delta_2C_2H_5H_4$ [5], $\delta_{C_{11}C_{10}O_5}$ [5] |
| 13  | 210.2                      | 202.8                              | 0.76                                  | 0.06                                                     | 2.28                        | $\tau_{C_8C_9}$ [56], $\tau_{C_{10}C_9}$ [16], $\rho_{C_9H_{17}H_{16}}$ [8]                                                                                                                                          |
| 14  | 244.7                      | 236.1                              | 0.94                                  | 0.19                                                     | 5.71                        | $\tau_{C_1C_2}$ [68], $\rho_{C_3H_6H_7}$ [9], $\tau_{C_3C_4}$ [8]                                                                                                                                                    |
| 15  | 254.1                      | 245.2                              | 0.06                                  | 0.02                                                     | 0.49                        | $\tau_{C_5C_6C_4}$ [24], $\delta_{C_5C_6C_4}$ [17], $\delta_2C_6H_8H_9$ [15], $\tau_{2/R5}$ [6]                                                                                                                      |
| 16  | 259.0                      | 249.9                              | 0.13                                  | 0.02                                                     | 0.62                        | $\omega_{C_5C_6C_4}$ [27], $\delta_{C_5C_6C_4}$ [26], $\omega_{out}C_4C_3$ [10], $\tau_{1/R5}$ [6], $\tau_{C_6O_1}$ [5]                                                                                              |
| 17  | 272.8                      | 263.2                              | 13.73                                 | 0.45                                                     | 12.00                       | $\tau_{C_5C_6C_4}$ [19], $\delta_2C_3H_6H_7$ [14], $\delta_{C_5C_6C_4}$ [13], $\delta_{C_{11}C_{10}O_5}$ [7], $\beta_{C_5C_4O_3}$ [6], $\tau_{2/R5}$ [6], $\delta_2C_2H_5H_4$ [5]                                    |
| 18  | 289.2                      | 279.1                              | 1.49                                  | 0.46                                                     | 11.51                       | $\delta_{C_{11}C_{10}O_5}$ [19], $\tau_{C_{11}C_{10}O_5}$ [13], $\delta_2C_8H_{14}H_{15}$ [10], $\rho_{C_{11}C_{10}O_5}$ [8], $\delta_2C_9H_{17}H_{16}$ [8], $\rho_{C_{10}C_{11}}$ [7], $\rho_{C_5C_6C_4}$ [5]       |
| 19  | 301.6                      | 291.1                              | 2.77                                  | 1.83                                                     | 43.32                       | $\delta_2C_9H_{17}H_{16}$ [19], $\tau_{C_{11}C_{10}O_5}$ [12], $\rho_{C_{10}C_{11}}$ [10], $\nu_{C_{10}C_9}$ [9], $\nu_{C_{10}C_{11}}$ [8], $\nu_{C_8C_9}$ [6]                                                       |
| 20  | 320.1                      | 308.9                              | 11.38                                 | 4.47                                                     | 98.78                       | $\tau_{1/R5}$ [17], $\omega_{C_{11}C_{10}O_5}$ [9], $\nu_{C_5C_4}$ [8], $\rho_{C_5C_6C_4}$ [6], $\tau_{C_6O_1}$ [5], $\delta_2C_3H_6H_7$ [5], $\delta_2C_6H_8H_9$ [5]                                                |
| 21  | 363.4                      | 350.7                              | 3.68                                  | 1.55                                                     | 29.62                       | $\tau_{C_6O_1}$ [38], $\delta_2C_2H_5H_4$ [9]                                                                                                                                                                        |
| 22  | 379.3                      | 366.0                              | 3.07                                  | 1.17                                                     | 21.28                       | $\delta_2C_8H_{14}H_{15}$ [18], $\beta_{C_9C_{10}O_6}$ [16], $\rho_{C_{11}C_{10}O_5}$ [11], $\delta_2C_2H_5H_4$ [8]                                                                                                  |
| 23  | 385.8                      | 372.3                              | 2.29                                  | 0.58                                                     | 10.27                       | $\tau_{C_6O_1}$ [34], $\delta_2C_8H_{14}H_{15}$ [16], $\rho_{C_5C_6C_4}$ [10], $\beta_{C_9C_{10}O_6}$ [6]                                                                                                            |
| 24  | 414.2                      | 399.7                              | 33.91                                 | 1.32                                                     | 21.59                       | $\delta_2C_2H_5H_4$ [18], $\beta_{C_5C_4O_3}$ [17], $\delta_2C_6H_8H_9$ [12], $\rho_{C_4C_3}$ [11], $\rho_{C_5C_6C_4}$ [9], $\tau_{1/R5}$ [7]                                                                        |
| 25  | 425.4                      | 410.5                              | 110.34                                | 1.96                                                     | 31.20                       | $\rho_{C_4C_3}$ [10], $\delta_2C_2H_5H_4$ [9], $\delta_{C_5C_6C_4}$ [7], $\rho_{C_{11}C_{10}O_5}$ [6], $\nu_{C_6C_5}$ [5], $\delta_2C_6H_8H_9$ [5]                                                                   |
| 26  | 451.8                      | 436.0                              | 6.34                                  | 0.95                                                     | 14.12                       | $\tau_{C_{11}C_{10}O_5}$ [19], $\tau_{1/R5}$ [11], $\rho_{C_{10}C_{11}}$ [11], $\nu_{C_{10}C_{11}}$ [9], $\rho_{C_5C_6C_4}$ [9], $\tau_{C_5C_6C_4}$ [7], $\tau_{C_{11}O_5}$ [5]                                      |
| 27  | 470.9                      | 454.4                              | 1.26                                  | 2.89                                                     | 40.74                       | $\omega_{C_{11}C_{10}O_5}$ [14], $\delta_{C_{11}C_{10}O_5}$ [13], $\rho_{C_{11}C_{10}O_5}$ [11], $\nu_{C_{12}C_{11}}$ [10], $\beta_{1/R5}$ [6]                                                                       |
| 28  | 558.2                      | 538.6                              | 1.01                                  | 0.46                                                     | 5.30                        | $\rho_{C_3H_6H_7}$ [30], $\omega_{out}C_4C_3$ [20], $\rho_{C_9H_{17}H_{16}}$ [7], $\tau_{C_5C_6C_4}$ [6], $\omega_{out}C_{10}C_{11}$ [6]                                                                             |
| 29  | 588.1                      | 567.5                              | 5.42                                  | 2.05                                                     | 21.95                       | $\rho_{C_9H_{17}H_{16}}$ [23], $\omega_{out}C_{10}C_{11}$ [14], $\tau_{C_{11}O_5}$ [13], $\rho_{C_3H_6H_7}$ [7], $\rho_{C_{11}C_{10}O_5}$ [6]                                                                        |
| 30  | 608.5                      | 587.2                              | 28.36                                 | 1.27                                                     | 13.01                       | $\tau_{C_{11}O_5}$ [51], $\rho_{C_{11}C_{10}O_5}$ [11], $\rho_{C_{10}C_{11}}$ [6], $\nu_{C_{10}C_{11}}$ [6]                                                                                                          |
| 31  | 643.0                      | 620.5                              | 35.59                                 | 2.99                                                     | 28.63                       | $\tau_{C_{11}O_5}$ [16], $\rho_{C_5C_6C_4}$ [12], $\tau_{1/R5}$ [9], $\rho_{C_{11}C_{10}O_5}$ [9], $\omega_{C_{11}C_{10}O_5}$ [8], $\nu_{C_{11}O_5}$ [7], $\beta_{1/R5}$ [7]                                         |
| 32  | 655.9                      | 633.0                              | 60.38                                 | 1.38                                                     | 12.84                       | $\rho_{C_5C_6C_4}$ [21], $\delta_2C_6H_8H_9$ [16], $\beta_{C_5C_4O_3}$ [10], $\tau_{1/R5}$ [8], $\nu_{C_5C_4}$ [7], $\nu_{C_6C_5}$ [5]                                                                               |
| 33  | 721.9                      | 696.7                              | 22.83                                 | 1.32                                                     | 10.83                       | $\beta_{1/R5}$ [21], $\rho_{C_8H_{14}H_{15}}$ [8], $\beta_{C_9C_{10}O_6}$ [8], $\beta_{2/R5}$ [8], $\rho_{C_2H_5H_4}$ [6]                                                                                            |
| 34  | 732.6                      | 707.0                              | 12.08                                 | 1.96                                                     | 15.86                       | $\beta_{2/R5}$ [28], $\rho_{C_8H_{14}H_{15}}$ [8], $\beta_{C_9C_{10}O_6}$ [7], $\rho_{C_4C_3}$ [6], $\delta_2C_6H_8H_9$ [5]                                                                                          |
| 35  | 761.0                      | 734.4                              | 8.20                                  | 0.22                                                     | 1.68                        | $\rho_{C_2H_5H_4}$ [47], $\rho_{C_1H_1H_2H_3}$ [11], $\omega_{out}C_4C_3$ [8], $\tau_{C_3H_6H_7}$ [6]                                                                                                                |
| 36  | 763.4                      | 736.7                              | 4.89                                  | 0.19                                                     | 1.43                        | $\rho_{C_8H_{14}H_{15}}$ [41], $\rho_{C_7H_{11}H_{12}H_{13}}$ [12], $\omega_{out}C_{10}C_{11}$ [6], $\tau_{C_9H_{17}H_{16}}$ [5]                                                                                     |
| 37  | 800.2                      | 772.2                              | 2.47                                  | 9.14                                                     | 65.56                       | $\nu_{C_3C_4}$ [12], $\beta_{2/R5}$ [12], $\nu_{C_5O_4}$ [10], $\nu_{C_{12}C_{11}}$ [9], $\nu_{O_2C_{11}}$ [9], $\nu_{C_5C_4}$ [8], $\rho_{C_4C_3}$ [8], $\delta_2C_3H_6H_7$ [7]                                     |

Table S1 (continued)

| No. | Freq.<br>/cm <sup>-1</sup> | Freq.<br>Scal<br>/cm <sup>-1</sup> | IR intensity<br>/km·mol <sup>-1</sup> | Raman<br>activity<br>/Å <sup>4</sup> a.u. <sup>-1</sup> | Raman<br>intensity<br>/a.u. | PED (contributions > 5%)                                                                                                                                                                                                |
|-----|----------------------------|------------------------------------|---------------------------------------|---------------------------------------------------------|-----------------------------|-------------------------------------------------------------------------------------------------------------------------------------------------------------------------------------------------------------------------|
| 38  | 815.1                      | 786.6                              | 19.85                                 | 1.20                                                    | 8.40                        | $\nu_{C_{10}C_9}$ [14], $\nu_{O_2C_{11}}$ [11], $\nu_{C_{10}C_{11}}$ [9], $\beta_{1/RS}$ [7], $\beta_{C_9C_{10}O_6}$ [7], $\nu_{C_3C_4}$ [7], $\delta_{2C_9H_{17}H_{16}}$ [6]                                           |
| 39  | 870.6                      | 840.1                              | 18.34                                 | 7.36                                                    | 47.03                       | $\rho_{C_3H_6H_7}$ [18], $\rho_{1C_1H_1H_2H_3}$ [17], $\tau_{C_2H_5H_4}$ [15], $\rho_{2C_1H_1H_2H_3}$ [8], $\omega_{out}C_4C_3$ [7], $\rho_{C_6H_8H_9}$ [6]                                                             |
| 40  | 885.5                      | 854.5                              | 1.79                                  | 1.49                                                    | 9.30                        | $\rho_{1C_7H_{11}H_{12}H_{13}}$ [26], $\rho_{C_9H_{17}H_{16}}$ [22], $\tau_{C_8H_{14}H_{15}}$ [18], $\omega_{out}C_{10}C_{11}$ [7]                                                                                      |
| 41  | 889.4                      | 858.3                              | 4.84                                  | 0.27                                                    | 1.65                        | $\nu_{C_5O_4}$ [14], $\rho_{C_6H_8H_9}$ [12], $\nu_{C_{10}C_9}$ [7], $\nu_{O_2C_{11}}$ [6], $\rho_{1C_1H_1H_2H_3}$ [6], $\rho_{C_{12}H_{19}H_{18}}$ [5], $\rho_{2C_7H_{11}H_{12}H_{13}}$ [5]                            |
| 42  | 894.4                      | 863.1                              | 13.38                                 | 6.94                                                    | 42.67                       | $\rho_{C_6H_8H_9}$ [13], $\nu_{C_5O_4}$ [11], $\rho_{2C_7H_{11}H_{12}H_{13}}$ [8], $\nu_{C_2C_3}$ [7], $\nu_{C_8C_9}$ [6], $\rho_{2C_1H_1H_2H_3}$ [5]                                                                   |
| 43  | 912.5                      | 880.6                              | 36.33                                 | 2.44                                                    | 14.61                       | $\rho_{2C_1H_1H_2H_3}$ [19], $\nu_{C_2C_3}$ [17], $\nu_{C_1C_2}$ [9], $\rho_{2C_7H_{11}H_{12}H_{13}}$ [8], $\rho_{1C_1H_1H_2H_3}$ [7], $\nu_{C_8C_9}$ [7]                                                               |
| 44  | 929.6                      | 897.1                              | 13.83                                 | 2.82                                                    | 16.41                       | $\rho_{C_{12}H_{19}H_{18}}$ [12], $\nu_{O_2C_{11}}$ [10], $\rho_{2C_7H_{11}H_{12}H_{13}}$ [9], $\nu_{C_8C_9}$ [9], $\nu_{C_7C_8}$ [8], $\tau_{C_{12}H_{19}H_{18}}$ [5]                                                  |
| 45  | 985.7                      | 951.2                              | 98.67                                 | 2.58                                                    | 13.79                       | $\nu_{O_2C_{11}}$ [35], $\beta_{1/RS}$ [15], $\nu_{C_{11}O_5}$ [10], $\omega_{C_{11}C_{10}O_5}$ [9], $\nu_{C_{12}C_{11}}$ [7]                                                                                           |
| 46  | 1027.4                     | 991.4                              | 22.22                                 | 3.02                                                    | 15.21                       | $\rho_{C_{12}H_{19}H_{18}}$ [21], $\nu_{C_{10}C_9}$ [14], $\nu_{C_{12}O_4}$ [8], $\nu_{C_5O_4}$ [8], $\omega_{C_9H_{17}H_{16}}$ [6], $\nu_{C_{12}C_{11}}$ [6]                                                           |
| 47  | 1032.2                     | 996.1                              | 155.37                                | 0.18                                                    | 0.88                        | $\nu_{C_3C_4}$ [28], $\nu_{C_5O_2}$ [13], $\omega_{C_3H_6H_7}$ [11], $\beta_{C_5C_4O_3}$ [9], $\rho_{C_6H_8H_9}$ [7]                                                                                                    |
| 48  | 1049.9                     | 1013.2                             | 4.27                                  | 3.56                                                    | 17.37                       | $\beta_{C_6O_1H_{10}}$ [12], $\nu_{C_5O_4}$ [9], $\rho_{C_6H_8H_9}$ [9], $\nu_{C_{12}O_4}$ [9], $\nu_{C_6O_1}$ [8], $\omega_{C_5C_6C_4}$ [6]                                                                            |
| 49  | 1050.7                     | 1013.9                             | 5.05                                  | 6.17                                                    | 30.08                       | $\nu_{C_7C_8}$ [52], $\nu_{C_8C_9}$ [13], $\nu_{C_1C_2}$ [9]                                                                                                                                                            |
| 50  | 1052.1                     | 1015.3                             | 36.03                                 | 1.76                                                    | 8.55                        | $\nu_{C_1C_2}$ [50], $\nu_{C_2C_3}$ [15], $\nu_{C_7C_8}$ [5]                                                                                                                                                            |
| 51  | 1056.6                     | 1019.6                             | 35.09                                 | 3.38                                                    | 16.36                       | $\nu_{C_{12}O_4}$ [44], $\nu_{C_5O_4}$ [13]                                                                                                                                                                             |
| 52  | 1081.8                     | 1043.9                             | 182.09                                | 2.25                                                    | 10.48                       | $\nu_{C_6O_1}$ [39], $\tau_{C_3H_6H_7}$ [9], $\beta_{C_6O_1H_{10}}$ [7], $\rho_{C_2H_5H_4}$ [6], $\rho_{1C_1H_1H_2H_3}$ [5]                                                                                             |
| 53  | 1114.6                     | 1075.5                             | 0.16                                  | 1.12                                                    | 4.98                        | $\tau_{C_9H_{17}H_{16}}$ [19], $\rho_{C_8H_{14}H_{15}}$ [11], $\rho_{C_9H_{17}H_{16}}$ [11], $\tau_{C_8H_{14}H_{15}}$ [7], $\nu_{C_6O_1}$ [7], $\rho_{1C_7H_{11}H_{12}H_{13}}$ [6], $\rho_{2C_7H_{11}H_{12}H_{13}}$ [5] |
| 54  | 1117.3                     | 1078.2                             | 15.71                                 | 0.49                                                    | 2.17                        | $\nu_{C_6O_1}$ [22], $\tau_{C_3H_6H_7}$ [7], $\rho_{1C_1H_1H_2H_3}$ [6]                                                                                                                                                 |
| 55  | 1126.6                     | 1087.2                             | 23.72                                 | 3.15                                                    | 13.85                       | $\nu_{C_2C_3}$ [14], $\rho_{2C_1H_1H_2H_3}$ [10], $\nu_{C_8C_9}$ [7], $\rho_{C_5C_6C_4}$ [5]                                                                                                                            |
| 56  | 1140.3                     | 1100.4                             | 44.76                                 | 0.72                                                    | 3.12                        | $\nu_{C_8C_9}$ [17], $\rho_{2C_7H_{11}H_{12}H_{13}}$ [9], $\nu_{C_2C_3}$ [8], $\rho_{1C_7H_{11}H_{12}H_{13}}$ [7], $\nu_{C_5O_2}$ [6], $\rho_{2C_1H_1H_2H_3}$ [6]                                                       |
| 57  | 1165.6                     | 1124.8                             | 20.76                                 | 6.90                                                    | 28.75                       | $\tau_{C_6H_8H_9}$ [11], $\nu_{C_5C_4}$ [8], $\nu_{C_6O_1}$ [6], $\nu_{C_2C_3}$ [5], $\nu_{C_{10}C_{11}}$ [5]                                                                                                           |
| 58  | 1178.8                     | 1137.6                             | 73.28                                 | 1.96                                                    | 8.04                        | $\nu_{C_{11}O_5}$ [18], $\beta_{C_{11}O_5H_{20}}$ [10], $\rho_{C_{12}H_{19}H_{18}}$ [9], $\rho_{C_{11}C_{10}O_5}$ [7], $\nu_{C_5O_2}$ [6], $\nu_{C_{10}C_{11}}$ [6]                                                     |
| 59  | 1198.7                     | 1156.8                             | 17.52                                 | 0.82                                                    | 3.29                        | $\nu_{C_{12}C_{11}}$ [13], $\tau_{C_{12}H_{19}H_{18}}$ [11], $\nu_{C_5O_2}$ [11], $\nu_{C_{11}O_5}$ [9], $\omega_{C_{11}C_{10}O_5}$ [7], $\nu_{C_6C_5}$ [6]                                                             |
| 60  | 1243.5                     | 1199.9                             | 25.81                                 | 2.83                                                    | 10.65                       | $\tau_{C_{12}H_{19}H_{18}}$ [43], $\nu_{C_{11}O_5}$ [11], $\beta_{C_{11}O_5H_{20}}$ [7]                                                                                                                                 |
| 61  | 1251.1                     | 1207.3                             | 44.68                                 | 4.92                                                    | 18.36                       | $\tau_{C_3H_6H_7}$ [26], $\rho_{1C_1H_1H_2H_3}$ [10], $\tau_{C_9H_{17}H_{16}}$ [10], $\rho_{C_2H_5H_4}$ [10], $\tau_{C_2H_5H_4}$ [7]                                                                                    |
| 62  | 1255.8                     | 1211.9                             | 0.42                                  | 0.42                                                    | 1.56                        | $\tau_{C_9H_{17}H_{16}}$ [29], $\rho_{1C_7H_{11}H_{12}H_{13}}$ [10], $\rho_{C_8H_{14}H_{15}}$ [10], $\tau_{C_8H_{14}H_{15}}$ [8], $\tau_{C_{12}H_{19}H_{18}}$ [7], $\tau_{C_3H_6H_7}$ [6], $\nu_{C_{11}O_5}$ [5]        |
| 63  | 1258.0                     | 1214.0                             | 26.86                                 | 3.30                                                    | 12.18                       | $\tau_{C_6H_8H_9}$ [20], $\rho_{C_5C_6C_4}$ [18], $\nu_{C_6C_5}$ [15], $\beta_{C_6O_1H_{10}}$ [12], $\nu_{C_5C_4}$ [9], $\rho_{C_6H_8H_9}$ [6]                                                                          |



Table S1 (continued)

| No. | Freq.<br>/cm <sup>-1</sup> | Freq.<br>Scal<br>/cm <sup>-1</sup> | IR intensity<br>/km·mol <sup>-1</sup> | Raman<br>activity<br>/Å <sup>4</sup> ·a.u. <sup>-1</sup> | Raman<br>intensity<br>/a.u. | PED ( <i>contributions</i> > 5%)                                                                                                                                                          |
|-----|----------------------------|------------------------------------|---------------------------------------|----------------------------------------------------------|-----------------------------|-------------------------------------------------------------------------------------------------------------------------------------------------------------------------------------------|
| 64  | 1268.0                     | 1223.6                             | 12.93                                 | 1.02                                                     | 3.72                        | $\beta_{2/RS}$ [15], $\nu_{C_6C_5}$ [10], $\nu_{C_5O_4}$ [10], $\delta_{C_5C_6C_4}$ [7], $\nu_{C_{11}O_5}$ [6], $\omega_{C_6H_8H_9}$ [6]                                                  |
| 65  | 1327.6                     | 1281.1                             | 11.74                                 | 4.27                                                     | 14.48                       | $\tau_{C_8H_{14}H_{15}}$ [56], $\tau_{C_9H_{17}H_{16}}$ [17], $\omega_{C_8H_{14}H_{15}}$ [7], $\omega_{C_9H_{17}H_{16}}$ [6]                                                              |
| 66  | 1331.9                     | 1285.3                             | 2.16                                  | 6.49                                                     | 21.88                       | $\tau_{C_2H_3H_4}$ [65], $\tau_{C_3H_6H_7}$ [24]                                                                                                                                          |
| 67  | 1335.8                     | 1289.0                             | 17.93                                 | 4.70                                                     | 15.78                       | $\omega_{C_8H_{14}H_{15}}$ [39], $\omega_{C_9H_{17}H_{16}}$ [21], $\tau_{C_8H_{14}H_{15}}$ [8], $\nu_{C_{10}C_9}$ [7]                                                                     |
| 68  | 1338.2                     | 1291.4                             | 4.16                                  | 0.94                                                     | 3.15                        | $\omega_{C_2H_5H_4}$ [44], $\omega_{C_3H_6H_7}$ [19], $\nu_{C_3C_4}$ [8]                                                                                                                  |
| 69  | 1375.5                     | 1327.4                             | 3.93                                  | 2.03                                                     | 6.48                        | $\omega_{C_{12}H_{19}H_{18}}$ [69], $\nu_{C_{12}C_{11}}$ [9], $\omega_{C_6H_8H_9}$ [7]                                                                                                    |
| 70  | 1388.3                     | 1339.7                             | 40.69                                 | 1.59                                                     | 5.01                        | $\tau_{C_6H_8H_9}$ [30], $\beta_{C_6O_1H_{10}}$ [27], $\omega_{C_6H_8H_9}$ [16]                                                                                                           |
| 71  | 1405.2                     | 1356.0                             | 48.76                                 | 1.45                                                     | 4.48                        | $\omega_{C_9H_{17}H_{16}}$ [31], $\omega_{C_8H_{14}H_{15}}$ [29], $\nu_{C_8C_9}$ [11], $\nu_{C_{10}C_9}$ [8], $\beta_{C_{11}O_5H_{20}}$ [5]                                               |
| 72  | 1411.2                     | 1361.8                             | 10.43                                 | 1.39                                                     | 4.26                        | $\omega_{C_3H_6H_7}$ [30], $\omega_{C_2H_5H_4}$ [19], $\nu_{C_3C_4}$ [10], $\delta_{\nu}C_3H_6H_7$ [9], $\nu_{C_2C_3}$ [8], $\omega_{C_6H_8H_9}$ [6]                                      |
| 73  | 1419.6                     | 1369.9                             | 1.86                                  | 0.42                                                     | 1.28                        | $\beta_{\nu}C_7H_{11}H_{12}H_{13}$ [85], $\nu_{C_7C_8}$ [10]                                                                                                                              |
| 74  | 1422.8                     | 1373.0                             | 5.22                                  | 0.29                                                     | 0.86                        | $\omega_{C_6H_8H_9}$ [32], $\omega_{C_3H_6H_7}$ [8], $\beta_{\nu}C_1H_1H_2H_3$ [8], $\beta_{C_6O_1H_{10}}$ [8], $\delta_{\nu}C_3H_6H_7$ [7], $\omega_{C_2H_5H_4}$ [7], $\nu_{C_6C_5}$ [5] |
| 75  | 1425.8                     | 1375.9                             | 19.42                                 | 1.97                                                     | 5.94                        | $\beta_{\nu}C_1H_1H_2H_3$ [80], $\omega_{C_6H_8H_9}$ [7], $\nu_{C_1C_2}$ [7]                                                                                                              |
| 76  | 1432.5                     | 1382.4                             | 28.89                                 | 5.27                                                     | 15.74                       | $\delta_{\nu}C_3H_6H_7$ [73], $\omega_{C_6H_8H_9}$ [11]                                                                                                                                   |
| 77  | 1450.3                     | 1399.6                             | 14.58                                 | 4.66                                                     | 13.63                       | $\beta_{C_{11}O_5H_{20}}$ [46], $\nu_{C_{10}C_{11}}$ [15], $\rho_{C_{11}C_{10}O_5}$ [6]                                                                                                   |
| 78  | 1452.9                     | 1402.0                             | 78.87                                 | 3.90                                                     | 11.36                       | $\delta_{\nu}C_9H_{17}H_{16}$ [85]                                                                                                                                                        |
| 79  | 1495.0                     | 1442.6                             | 2.28                                  | 11.63                                                    | 32.29                       | $\delta_{\nu}C_2H_5H_4$ [71], $\beta_{a1}C_1H_1H_2H_3$ [24]                                                                                                                               |
| 80  | 1495.2                     | 1442.9                             | 1.79                                  | 12.03                                                    | 33.40                       | $\delta_{\nu}C_8H_{14}H_{15}$ [69], $\beta_{a2}C_7H_{11}H_{12}H_{13}$ [20], $\beta_{a1}C_7H_{11}H_{12}H_{13}$ [7]                                                                         |
| 81  | 1501.6                     | 1449.0                             | 5.14                                  | 4.83                                                     | 13.31                       | $\delta_{\nu}C_6H_8H_9$ [93]                                                                                                                                                              |
| 82  | 1503.4                     | 1450.8                             | 6.49                                  | 8.52                                                     | 23.43                       | $\beta_{a1}C_7H_{11}H_{12}H_{13}$ [68], $\beta_{a2}C_7H_{11}H_{12}H_{13}$ [23], $\rho_{C_7H_{11}H_{12}H_{13}}$ [6]                                                                        |
| 83  | 1504.9                     | 1452.2                             | 6.79                                  | 9.10                                                     | 24.99                       | $\beta_{a2}C_1H_1H_2H_3$ [57], $\delta_{C_{12}H_{19}H_{18}}$ [36]                                                                                                                         |
| 84  | 1510.1                     | 1457.3                             | 6.64                                  | 0.84                                                     | 2.30                        | $\delta_{C_{12}H_{19}H_{18}}$ [60], $\beta_{a2}C_1H_1H_2H_3$ [33]                                                                                                                         |
| 85  | 1510.3                     | 1457.4                             | 6.17                                  | 0.79                                                     | 2.16                        | $\beta_{a1}C_1H_1H_2H_3$ [62], $\delta_{\nu}C_2H_3H_4$ [27], $\rho_{C_2}C_1H_1H_2H_3$ [5]                                                                                                 |
| 86  | 1511.8                     | 1458.9                             | 8.63                                  | 7.52                                                     | 20.47                       | $\beta_{a2}C_7H_{11}H_{12}H_{13}$ [45], $\delta_{\nu}C_8H_{14}H_{15}$ [29], $\beta_{a1}C_7H_{11}H_{12}H_{13}$ [15]                                                                        |
| 87  | 1756.9                     | 1695.4                             | 114.32                                | 6.40                                                     | 13.29                       | $\nu_{C_4O_3}$ [84]                                                                                                                                                                       |
| 88  | 1797.8                     | 1734.9                             | 123.07                                | 6.15                                                     | 12.22                       | $\nu_{O_6C_{10}}$ [86]                                                                                                                                                                    |
| 89  | 3019.0                     | 2913.3                             | 32.28                                 | 138.80                                                   | 84.27                       | $\nu_{C_7H_{13}}$ [38], $\nu_{C_7H_{12}}$ [37], $\nu_{C_7H_{11}}$ [23]                                                                                                                    |
| 90  | 3021.3                     | 2915.5                             | 30.89                                 | 146.04                                                   | 88.48                       | $\nu_{C_1H_3}$ [38], $\nu_{H_1C_1}$ [37], $\nu_{C_1H_2}$ [22]                                                                                                                             |
| 91  | 3023.0                     | 2917.2                             | 27.79                                 | 104.01                                                   | 62.91                       | $\nu_{C_6H_8}$ [85], $\nu_{C_6H_9}$ [14]                                                                                                                                                  |
| 92  | 3027.3                     | 2921.4                             | 2.49                                  | 172.16                                                   | 103.72                      | $\nu_{H_{17}C_9}$ [48], $\nu_{C_9H_{16}}$ [42], $\nu_{C_8H_{15}}$ [5]                                                                                                                     |
| 93  | 3029.1                     | 2923.1                             | 7.01                                  | 171.58                                                   | 103.20                      | $\nu_{H_6C_3}$ [69], $\nu_{C_3H_7}$ [21]                                                                                                                                                  |
| 94  | 3038.5                     | 2932.2                             | 17.67                                 | 36.63                                                    | 21.84                       | $\nu_{C_8H_{15}}$ [60], $\nu_{C_8H_{14}}$ [28], $\nu_{H_{17}C_9}$ [8]                                                                                                                     |
| 95  | 3041.5                     | 2935.1                             | 15.25                                 | 43.34                                                    | 25.77                       | $\nu_{C_2H_5}$ [49], $\nu_{C_2H_4}$ [42], $\nu_{H_6C_3}$ [6]                                                                                                                              |
| 96  | 3046.4                     | 2939.8                             | 1.36                                  | 92.92                                                    | 55.00                       | $\nu_{C_{12}H_{19}}$ [89], $\nu_{C_{12}H_{18}}$ [11]                                                                                                                                      |
| 97  | 3048.9                     | 2942.2                             | 1.57                                  | 83.14                                                    | 49.10                       | $\nu_{C_9H_{16}}$ [45], $\nu_{H_{17}C_9}$ [33], $\nu_{C_8H_{14}}$ [16]                                                                                                                    |
| 98  | 3051.1                     | 2944.3                             | 28.55                                 | 94.42                                                    | 55.65                       | $\nu_{C_3H_7}$ [64], $\nu_{H_6C_3}$ [16], $\nu_{C_2H_4}$ [12], $\nu_{C_2H_5}$ [6]                                                                                                         |

Table S1 (continued)

| No. | Freq.<br>/cm <sup>-1</sup> | Freq.<br>Scal<br>/cm <sup>-1</sup> | IR intensity<br>/km·mol <sup>-1</sup> | Raman<br>activity<br>/Å <sup>4</sup> a.u. <sup>-1</sup> | Raman<br>intensity<br>/a.u. | PED ( <i>contributions</i> > 5%)                                                                                                                                                                                                 |
|-----|----------------------------|------------------------------------|---------------------------------------|---------------------------------------------------------|-----------------------------|----------------------------------------------------------------------------------------------------------------------------------------------------------------------------------------------------------------------------------|
| 99  | 3062.9                     | 2955.7                             | 0.49                                  | 30.42                                                   | 17.73                       | $\nu_{\text{C}_8\text{H}_{14}}$ [24], $\nu_{\text{C}_7\text{H}_{13}}$ [24], $\nu_{\text{C}_7\text{H}_{12}}$ [22], $\nu_{\text{C}_8\text{H}_{15}}$ [13], $\nu_{\text{C}_9\text{H}_{16}}$ [8], $\nu_{\text{H}_{17}\text{C}_9}$ [8] |
| 100 | 3064.9                     | 2957.6                             | 0.29                                  | 29.87                                                   | 17.38                       | $\nu_{\text{H}_1\text{C}_1}$ [22], $\nu_{\text{C}_1\text{H}_3}$ [22], $\nu_{\text{C}_2\text{H}_5}$ [21], $\nu_{\text{C}_2\text{H}_4}$ [19], $\nu_{\text{C}_3\text{H}_7}$ [10]                                                    |
| 101 | 3086.2                     | 2978.2                             | 54.83                                 | 11.62                                                   | 6.63                        | $\nu_{\text{C}_7\text{H}_{12}}$ [28], $\nu_{\text{C}_8\text{H}_{14}}$ [26], $\nu_{\text{C}_7\text{H}_{13}}$ [24], $\nu_{\text{C}_8\text{H}_{15}}$ [18]                                                                           |
| 102 | 3087.6                     | 2979.6                             | 42.80                                 | 114.14                                                  | 65.03                       | $\nu_{\text{H}_1\text{C}_1}$ [24], $\nu_{\text{C}_1\text{H}_3}$ [23], $\nu_{\text{C}_2\text{H}_5}$ [19], $\nu_{\text{C}_2\text{H}_4}$ [18], $\nu_{\text{C}_6\text{H}_9}$ [12]                                                    |
| 103 | 3088.0                     | 2979.9                             | 42.54                                 | 7.93                                                    | 4.52                        | $\nu_{\text{C}_7\text{H}_{11}}$ [74], $\nu_{\text{C}_7\text{H}_{13}}$ [12], $\nu_{\text{C}_7\text{H}_{12}}$ [12]                                                                                                                 |
| 104 | 3090.5                     | 2982.3                             | 29.38                                 | 51.36                                                   | 29.19                       | $\nu_{\text{C}_6\text{H}_9}$ [73], $\nu_{\text{C}_6\text{H}_8}$ [12]                                                                                                                                                             |
| 105 | 3091.2                     | 2983.0                             | 33.99                                 | 121.81                                                  | 69.17                       | $\nu_{\text{C}_1\text{H}_2}$ [75], $\nu_{\text{C}_1\text{H}_3}$ [12], $\nu_{\text{H}_1\text{C}_1}$ [12]                                                                                                                          |
| 106 | 3141.4                     | 3031.4                             | 1.38                                  | 64.15                                                   | 34.78                       | $\nu_{\text{C}_{12}\text{H}_{18}}$ [89], $\nu_{\text{C}_{12}\text{H}_{19}}$ [11]                                                                                                                                                 |
| 107 | 3613.4                     | 3486.9                             | 298.90                                | 114.15                                                  | 39.98                       | $\nu_{\text{O}_5\text{H}_{20}}$ [100]                                                                                                                                                                                            |
| 108 | 3795.9                     | 3663.0                             | 38.70                                 | 41.03                                                   | 12.12                       | $\nu_{\text{O}_1\text{H}_{10}}$ [100]                                                                                                                                                                                            |

Table S2 Definitions of internal coordinates used in the normal analysis of **6a** in GAR2PED program

| Vibration                          | Definition                                                   |
|------------------------------------|--------------------------------------------------------------|
| $\nu_{\text{C}_6\text{O}_1}$       | $\nu_{\text{C}_6\text{O}_1}$ the stretching vibrations       |
| $\nu_{\text{C}_6\text{H}_8}$       | $\nu_{\text{C}_6\text{H}_8}$ the stretching vibrations       |
| $\nu_{\text{C}_6\text{H}_9}$       | $\nu_{\text{C}_6\text{H}_9}$ the stretching vibrations       |
| $\nu_{\text{C}_6\text{C}_5}$       | $\nu_{\text{C}_6\text{C}_5}$ the stretching vibrations       |
| $\nu_{\text{O}_1\text{H}_{10}}$    | $\nu_{\text{O}_1\text{H}_{10}}$ the stretching vibrations    |
| $\nu_{\text{O}_6\text{C}_{10}}$    | $\nu_{\text{O}_6\text{C}_{10}}$ the stretching vibrations    |
| $\nu_{\text{C}_7\text{C}_8}$       | $\nu_{\text{C}_7\text{C}_8}$ the stretching vibrations       |
| $\nu_{\text{C}_7\text{H}_{13}}$    | $\nu_{\text{C}_7\text{H}_{13}}$ the stretching vibrations    |
| $\nu_{\text{C}_7\text{H}_{11}}$    | $\nu_{\text{C}_7\text{H}_{11}}$ the stretching vibrations    |
| $\nu_{\text{C}_7\text{H}_{12}}$    | $\nu_{\text{C}_7\text{H}_{12}}$ the stretching vibrations    |
| $\nu_{\text{C}_8\text{H}_{14}}$    | $\nu_{\text{C}_8\text{H}_{14}}$ the stretching vibrations    |
| $\nu_{\text{C}_8\text{H}_{15}}$    | $\nu_{\text{C}_8\text{H}_{15}}$ the stretching vibrations    |
| $\nu_{\text{C}_8\text{C}_9}$       | $\nu_{\text{C}_8\text{C}_9}$ the stretching vibrations       |
| $\nu_{\text{C}_{10}\text{C}_9}$    | $\nu_{\text{C}_{10}\text{C}_9}$ the stretching vibrations    |
| $\nu_{\text{C}_{10}\text{C}_{11}}$ | $\nu_{\text{C}_{10}\text{C}_{11}}$ the stretching vibrations |
| $\nu_{\text{H}_{17}\text{C}_9}$    | $\nu_{\text{H}_{17}\text{C}_9}$ the stretching vibrations    |
| $\nu_{\text{C}_5\text{O}_4}$       | $\nu_{\text{C}_5\text{O}_4}$ the stretching vibrations       |
| $\nu_{\text{C}_5\text{C}_4}$       | $\nu_{\text{C}_5\text{C}_4}$ the stretching vibrations       |
| $\nu_{\text{C}_5\text{O}_2}$       | $\nu_{\text{C}_5\text{O}_2}$ the stretching vibrations       |
| $\nu_{\text{C}_{12}\text{O}_4}$    | $\nu_{\text{C}_{12}\text{O}_4}$ the stretching vibrations    |
| $\nu_{\text{C}_{12}\text{H}_{19}}$ | $\nu_{\text{C}_{12}\text{H}_{19}}$ the stretching vibrations |
| $\nu_{\text{C}_{12}\text{H}_{18}}$ | $\nu_{\text{C}_{12}\text{H}_{18}}$ the stretching vibrations |
| $\nu_{\text{C}_{12}\text{C}_{11}}$ | $\nu_{\text{C}_{12}\text{C}_{11}}$ the stretching vibrations |
| $\nu_{\text{H}_1\text{C}_1}$       | $\nu_{\text{H}_1\text{C}_1}$ the stretching vibrations       |
| $\nu_{\text{H}_6\text{C}_3}$       | $\nu_{\text{H}_6\text{C}_3}$ the stretching vibrations       |
| $\nu_{\text{C}_1\text{C}_2}$       | $\nu_{\text{C}_1\text{C}_2}$ the stretching vibrations       |

Table S2 (continued)

| Vibration                                                                                                                                                                                                                                                                              | Definition                                      |                                              |
|----------------------------------------------------------------------------------------------------------------------------------------------------------------------------------------------------------------------------------------------------------------------------------------|-------------------------------------------------|----------------------------------------------|
| $\nu\text{C}_1\text{H}_3$                                                                                                                                                                                                                                                              | $\nu\text{C}_1\text{H}_3$                       | the stretching vibrations                    |
| $\nu\text{C}_1\text{H}_2$                                                                                                                                                                                                                                                              | $\nu\text{C}_1\text{H}_2$                       | the stretching vibrations                    |
| $\nu\text{C}_2\text{C}_3$                                                                                                                                                                                                                                                              | $\nu\text{C}_2\text{C}_3$                       | the stretching vibrations                    |
| $\nu\text{C}_2\text{H}_5$                                                                                                                                                                                                                                                              | $\nu\text{C}_2\text{H}_5$                       | the stretching vibrations                    |
| $\nu\text{C}_2\text{H}_4$                                                                                                                                                                                                                                                              | $\nu\text{C}_2\text{H}_4$                       | the stretching vibrations                    |
| $\nu\text{C}_3\text{C}_4$                                                                                                                                                                                                                                                              | $\nu\text{C}_3\text{C}_4$                       | the stretching vibrations                    |
| $\nu\text{C}_3\text{H}_7$                                                                                                                                                                                                                                                              | $\nu\text{C}_3\text{H}_7$                       | the stretching vibrations                    |
| $\nu\text{C}_4\text{O}_3$                                                                                                                                                                                                                                                              | $\nu\text{C}_4\text{O}_3$                       | the stretching vibrations                    |
| $\nu\text{O}_2\text{C}_{11}$                                                                                                                                                                                                                                                           | $\nu\text{O}_2\text{C}_{11}$                    | the stretching vibrations                    |
| $\nu\text{C}_9\text{H}_{16}$                                                                                                                                                                                                                                                           | $\nu\text{C}_9\text{H}_{16}$                    | the stretching vibrations                    |
| $\nu\text{C}_{11}\text{O}_5$                                                                                                                                                                                                                                                           | $\nu\text{C}_{11}\text{O}_5$                    | the stretching vibrations                    |
| $\nu\text{O}_5\text{H}_{20}$                                                                                                                                                                                                                                                           | $\nu\text{O}_5\text{H}_{20}$                    | the stretching vibrations                    |
| $\beta\text{C}_{11}\text{O}_4\text{C}_{12} - 0.809\beta\text{C}_{12}\text{C}_5\text{O}_4 - 0.809\beta\text{O}_2\text{C}_{12}\text{C}_{11} + 0.309\beta\text{O}_4\text{O}_2\text{C}_5 + 0.309\beta\text{C}_5\text{C}_{11}\text{O}_2$                                                    | $\beta_{1/R5}$                                  | the five-membered ring deformations          |
| $-1.118\beta\text{C}_{12}\text{C}_5\text{O}_4 + 1.118\beta\text{O}_2\text{C}_{12}\text{C}_{11} + 1.809\beta\text{O}_4\text{O}_2\text{C}_5 - 1.809\beta\text{C}_5\text{C}_{11}\text{O}_2$                                                                                               | $\beta_{2/R5}$                                  |                                              |
| $0.309\tau\text{C}_{11}\text{C}_{12}\text{O}_4\text{C}_5 + 0.309\tau\text{O}_2\text{C}_{11}\text{C}_{12}\text{O}_4 - 0.809\tau\text{C}_{12}\text{O}_4\text{C}_5\text{O}_2 - 0.809\tau\text{C}_5\text{O}_2\text{C}_{11}\text{C}_{12} + \tau\text{O}_4\text{C}_5\text{O}_2\text{C}_{11}$ | $\tau_{1/R5}$                                   |                                              |
| $-1.118\tau\text{C}_5\text{O}_2\text{C}_{11}\text{C}_{12} + 1.118\tau\text{C}_{12}\text{O}_4\text{C}_5\text{O}_2 + 1.809\tau\text{O}_2\text{C}_{11}\text{C}_{12}\text{O}_4 - 1.809\tau\text{C}_{11}\text{C}_{12}\text{O}_4\text{C}_5$                                                  | $\tau_{2/R5}$                                   |                                              |
| $\beta\text{C}_6\text{H}_{10}\text{O}_1$                                                                                                                                                                                                                                               | $\beta\text{C}_6\text{O}_1\text{H}_{10}$        | the O–H bending                              |
| $\beta\text{C}_{11}\text{H}_{20}\text{O}_5$                                                                                                                                                                                                                                            | $\beta\text{C}_{11}\text{O}_5\text{H}_{20}$     |                                              |
| $\beta\text{H}_{19}\text{H}_{18}\text{C}_{12}$                                                                                                                                                                                                                                         | $\delta\text{C}_{12}\text{H}_{19}\text{H}_{18}$ | the CH <sub>2</sub> in the ring deformations |
| $\beta\text{O}_4\text{H}_{19}\text{C}_{12} - \beta\text{O}_4\text{H}_{18}\text{C}_{12} + \beta\text{C}_{11}\text{H}_{19}\text{C}_{12} - \beta\text{C}_{11}\text{H}_{18}\text{C}_{12}$                                                                                                  | $\rho\text{C}_{12}\text{H}_{19}\text{H}_{18}$   |                                              |
| $\beta\text{O}_4\text{H}_{19}\text{C}_{12} + \beta\text{O}_4\text{H}_{18}\text{C}_{12} - \beta\text{C}_{11}\text{H}_{19}\text{C}_{12} - \beta\text{C}_{11}\text{H}_{18}\text{C}_{12}$                                                                                                  | $\omega\text{C}_{12}\text{H}_{19}\text{H}_{18}$ |                                              |
| $\beta\text{O}_4\text{H}_{19}\text{C}_{12} - \beta\text{O}_4\text{H}_{18}\text{C}_{12} - \beta\text{C}_{11}\text{H}_{19}\text{C}_{12} + \beta\text{C}_{11}\text{H}_{18}\text{C}_{12}$                                                                                                  | $\tau\text{C}_{12}\text{H}_{19}\text{H}_{18}$   |                                              |
| $\beta\text{C}_6\text{C}_4\text{C}_5$                                                                                                                                                                                                                                                  | $\delta\text{C}_5\text{C}_6\text{C}_4$          | the CH <sub>2</sub> in the ring deformations |
| $\beta\text{O}_4\text{C}_6\text{C}_5 - \beta\text{O}_4\text{C}_4\text{C}_5 + \beta\text{O}_2\text{C}_6\text{C}_5 - \beta\text{O}_2\text{C}_4\text{C}_5$                                                                                                                                | $\rho\text{C}_5\text{C}_6\text{C}_4$            |                                              |
| $\beta\text{O}_4\text{C}_6\text{C}_5 + \beta\text{O}_4\text{C}_4\text{C}_5 - \beta\text{O}_2\text{C}_6\text{C}_5 - \beta\text{O}_2\text{C}_4\text{C}_5$                                                                                                                                | $\omega\text{C}_5\text{C}_6\text{C}_4$          |                                              |
| $\beta\text{O}_4\text{C}_6\text{C}_5 - \beta\text{O}_4\text{C}_4\text{C}_5 - \beta\text{O}_2\text{C}_6\text{C}_5 + \beta\text{O}_2\text{C}_4\text{C}_5$                                                                                                                                | $\tau\text{C}_5\text{C}_6\text{C}_4$            |                                              |
| $\beta\text{C}_{10}\text{O}_5\text{C}_{11}$                                                                                                                                                                                                                                            | $\delta\text{C}_{11}\text{C}_{10}\text{O}_5$    | the CH <sub>2</sub> in the ring deformations |
| $\beta\text{C}_{12}\text{C}_{10}\text{C}_{11} - \beta\text{C}_{12}\text{O}_5\text{C}_{11} + \beta\text{O}_2\text{C}_{10}\text{C}_{11} - \beta\text{O}_2\text{O}_5\text{C}_{11}$                                                                                                        | $\rho\text{C}_{11}\text{C}_{10}\text{O}_5$      |                                              |
| $\beta\text{C}_{12}\text{C}_{10}\text{C}_{11} + \beta\text{C}_{12}\text{O}_5\text{C}_{11} - \beta\text{O}_2\text{C}_{10}\text{C}_{11} - \beta\text{O}_2\text{O}_5\text{C}_{11}$                                                                                                        | $\omega\text{C}_{11}\text{C}_{10}\text{O}_5$    |                                              |
| $\beta\text{C}_{12}\text{C}_{10}\text{C}_{11} - \beta\text{C}_{12}\text{O}_5\text{C}_{11} - \beta\text{O}_2\text{C}_{10}\text{C}_{11} + \beta\text{O}_2\text{O}_5\text{C}_{11}$                                                                                                        | $\tau\text{C}_{11}\text{C}_{10}\text{O}_5$      |                                              |
| $2\beta\text{O}_3\text{C}_5\text{C}_4 - \beta\text{O}_3\text{C}_3\text{C}_4 - \beta\text{C}_5\text{C}_3\text{C}_4$                                                                                                                                                                     | $\beta\text{C}_5\text{C}_4\text{O}_3$           | the C=O group deformations                   |
| $\beta\text{O}_3\text{C}_3\text{C}_4 - \beta\text{C}_5\text{C}_3\text{C}_4$                                                                                                                                                                                                            | $\rho\text{C}_4\text{C}_3$                      |                                              |
| $\gamma\text{C}_3\text{O}_3\text{C}_5\text{C}_4$                                                                                                                                                                                                                                       | $\omega_{out}\text{C}_4\text{C}_3$              |                                              |
| $2\beta\text{O}_6\text{C}_9\text{C}_{10} - \beta\text{O}_6\text{C}_{11}\text{C}_{10} - \beta\text{C}_9\text{C}_{11}\text{C}_{10}$                                                                                                                                                      | $\beta\text{C}_9\text{C}_{10}\text{O}_6$        | the C=O group deformations                   |
| $\beta\text{O}_6\text{C}_{11}\text{C}_{10} - \beta\text{C}_9\text{C}_{11}\text{C}_{10}$                                                                                                                                                                                                | $\rho\text{C}_{10}\text{C}_{11}$                |                                              |
| $\gamma\text{C}_{11}\text{O}_6\text{C}_9\text{C}_{10}$                                                                                                                                                                                                                                 | $\omega_{out}\text{C}_{10}\text{C}_{11}$        |                                              |
| $5\beta\text{H}_8\text{H}_9\text{C}_6 + \beta\text{O}_1\text{C}_5\text{C}_6$                                                                                                                                                                                                           | $\delta_1\text{C}_6\text{H}_8\text{H}_9$        | the aliphatic CH <sub>2</sub> deformations   |
| $\beta\text{H}_8\text{H}_9\text{C}_6 + 5\beta\text{O}_1\text{C}_5\text{C}_6$                                                                                                                                                                                                           | $\delta_2\text{C}_6\text{H}_8\text{H}_9$        |                                              |

Table S2 (continued)

| Vibration                                                                                                                                                                           | Definition                         |                                                                                                 |
|-------------------------------------------------------------------------------------------------------------------------------------------------------------------------------------|------------------------------------|-------------------------------------------------------------------------------------------------|
| $\beta O_1H_8C_6 - \beta O_1H_9C_6 + \beta C_5H_8C_6 - \beta C_5H_9C_6$                                                                                                             | $\rho C_6H_8H_9$                   |                                                                                                 |
| $\beta O_1H_8C_6 + \beta O_1H_9C_6 - \beta C_5H_8C_6 - \beta C_5H_9C_6$                                                                                                             | $\omega C_6H_8H_9$                 |                                                                                                 |
| $\beta O_1H_8C_6 - \beta O_1H_9C_6 - \beta C_5H_8C_6 + \beta C_5H_9C_6$                                                                                                             | $\tau C_6H_8H_9$                   |                                                                                                 |
| $5\beta H_6H_7C_3 + \beta C_4C_2C_3$                                                                                                                                                | $\delta_1 C_3H_6H_7$               | the aliphatic CH <sub>2</sub> deformations                                                      |
| $\beta H_6H_7C_3 + 5\beta C_4C_2C_3$                                                                                                                                                | $\delta_2 C_3H_6H_7$               |                                                                                                 |
| $\beta C_4H_6C_3 - \beta C_4H_7C_3 + \beta C_2H_6C_3 - \beta C_2H_7C_3$                                                                                                             | $\rho C_3H_6H_7$                   |                                                                                                 |
| $\beta C_4H_6C_3 + \beta C_4H_7C_3 - \beta C_2H_6C_3 - \beta C_2H_7C_3$                                                                                                             | $\omega C_3H_6H_7$                 |                                                                                                 |
| $\beta C_4H_6C_3 - \beta C_4H_7C_3 - \beta C_2H_6C_3 + \beta C_2H_7C_3$                                                                                                             | $\tau C_3H_6H_7$                   |                                                                                                 |
| $5\beta H_5H_4C_2 + \beta C_3C_1C_2$                                                                                                                                                | $\delta_1 C_2H_5H_4$               | the aliphatic CH <sub>2</sub> deformations                                                      |
| $\beta H_5H_4C_2 + 5\beta C_3C_1C_2$                                                                                                                                                | $\delta_2 C_2H_5H_4$               |                                                                                                 |
| $\beta C_3H_5C_2 - \beta C_3H_4C_2 + \beta C_1H_5C_2 - \beta C_1H_4C_2$                                                                                                             | $\rho C_2H_5H_4$                   |                                                                                                 |
| $\beta C_3H_5C_2 + \beta C_3H_4C_2 - \beta C_1H_5C_2 - \beta C_1H_4C_2$                                                                                                             | $\omega C_2H_5H_4$                 |                                                                                                 |
| $\beta C_3H_5C_2 - \beta C_3H_4C_2 - \beta C_1H_5C_2 + \beta C_1H_4C_2$                                                                                                             | $\tau C_2H_5H_4$                   |                                                                                                 |
| $5\beta H_{17}H_{16}C_9 + \beta C_8C_{10}C_9$                                                                                                                                       | $\delta_1 C_9H_{17}H_{16}$         | the aliphatic CH <sub>2</sub> deformations                                                      |
| $\beta H_{17}H_{16}C_9 + 5\beta C_8C_{10}C_9$                                                                                                                                       | $\delta_2 C_9H_{17}H_{16}$         |                                                                                                 |
| $\beta C_8H_{17}C_9 - \beta C_8H_{16}C_9 + \beta C_{10}H_{17}C_9 - \beta C_{10}H_{16}C_9$                                                                                           | $\rho C_9H_{17}H_{16}$             |                                                                                                 |
| $\beta C_8H_{17}C_9 + \beta C_8H_{16}C_9 - \beta C_{10}H_{17}C_9 - \beta C_{10}H_{16}C_9$                                                                                           | $\omega C_9H_{17}H_{16}$           |                                                                                                 |
| $\beta C_8H_{17}C_9 - \beta C_8H_{16}C_9 - \beta C_{10}H_{17}C_9 + \beta C_{10}H_{16}C_9$                                                                                           | $\tau C_9H_{17}H_{16}$             |                                                                                                 |
| $5\beta H_{14}H_{15}C_8 + \beta C_7C_9C_8$                                                                                                                                          | $\delta_1 C_8H_{14}H_{15}$         | the aliphatic CH <sub>2</sub> deformations                                                      |
| $\beta H_{14}H_{15}C_8 + 5\beta C_7C_9C_8$                                                                                                                                          | $\delta_2 C_8H_{14}H_{15}$         |                                                                                                 |
| $\beta C_7H_{14}C_8 - \beta C_7H_{15}C_8 + \beta C_9H_{14}C_8 - \beta C_9H_{15}C_8$                                                                                                 | $\rho C_8H_{14}H_{15}$             |                                                                                                 |
| $\beta C_7H_{14}C_8 + \beta C_7H_{15}C_8 - \beta C_9H_{14}C_8 - \beta C_9H_{15}C_8$                                                                                                 | $\omega C_8H_{14}H_{15}$           |                                                                                                 |
| $\beta C_7H_{14}C_8 - \beta C_7H_{15}C_8 - \beta C_9H_{14}C_8 + \beta C_9H_{15}C_8$                                                                                                 | $\tau C_8H_{14}H_{15}$             |                                                                                                 |
| $\beta H_{13}H_{11}C_7 + \beta H_{13}H_{12}C_7 + \beta H_{11}H_{12}C_7 - \beta H_{13}C_8C_7 - \beta H_{11}C_8C_7 - \beta H_{12}C_8C_7$                                              | $\beta_5 C_7H_{11}H_{12}H_{13}$    | the methyl group deformations<br>C <sub>7</sub> H <sub>11</sub> H <sub>12</sub> H <sub>13</sub> |
| $2\beta H_{13}H_{11}C_7 - \beta H_{13}H_{12}C_7 - \beta H_{11}H_{12}C_7$                                                                                                            | $\beta_{a1} C_7H_{11}H_{12}H_{13}$ |                                                                                                 |
| $\beta H_{13}H_{12}C_7 - \beta H_{11}H_{12}C_7$                                                                                                                                     | $\beta_{a2} C_7H_{11}H_{12}H_{13}$ |                                                                                                 |
| $2\beta H_{13}C_8C_7 - \beta H_{11}C_8C_7 - \beta H_{12}C_8C_7$                                                                                                                     | $\rho_1 C_7H_{11}H_{12}H_{13}$     |                                                                                                 |
| $\beta H_{11}C_8C_7 - \beta H_{12}C_8C_7$                                                                                                                                           | $\rho_2 C_7H_{11}H_{12}H_{13}$     |                                                                                                 |
| $\beta H_1H_3C_1 + \beta H_1H_2C_1 + \beta H_3H_2C_1 - \beta H_1C_2C_1 - \beta H_3C_2C_1 - \beta H_2C_2C_1$                                                                         | $\beta_5 C_1H_1H_2H_3$             | the methyl group deformations<br>C <sub>1</sub> H <sub>1</sub> H <sub>2</sub> H <sub>3</sub>    |
| $2\beta H_1H_3C_1 - \beta H_1H_2C_1 - \beta H_3H_2C_1$                                                                                                                              | $\beta_{a1} C_1H_1H_2H_3$          |                                                                                                 |
| $\beta H_1H_2C_1 - \beta H_3H_2C_1$                                                                                                                                                 | $\beta_{a2} C_1H_1H_2H_3$          |                                                                                                 |
| $2\beta H_1C_2C_1 - \beta H_3C_2C_1 - \beta H_2C_2C_1$                                                                                                                              | $\rho_1 C_1H_1H_2H_3$              |                                                                                                 |
| $\beta H_3C_2C_1 - \beta H_2C_2C_1$                                                                                                                                                 | $\rho_2 C_1H_1H_2H_3$              |                                                                                                 |
| $\tau C_{10}C_{11}O_5H_{20} + \tau C_{12}C_{11}O_5H_{20} + \tau O_2C_{11}O_5H_{20}$                                                                                                 | $\tau C_{11}O_5$                   | torsions                                                                                        |
| $\tau O_1C_6C_5O_4 + \tau H_8C_6C_5O_4 + \tau H_9C_6C_5O_4 + \tau O_1C_6C_5C_4 + \tau H_8C_6C_5C_4 + \tau H_9C_6C_5C_4 + \tau O_1C_6C_5O_2 + \tau H_8C_6C_5O_2 + \tau H_9C_6C_5O_2$ | $\tau C_6C_5$                      | torsions                                                                                        |
| $\tau H_8C_6O_1H_{10} + \tau H_9C_6O_1H_{10} + \tau C_5C_6O_1H_{10}$                                                                                                                | $\tau C_6O_1$                      | torsions                                                                                        |
| $\tau C_6C_5C_4C_3 + \tau O_4C_5C_4C_3 + \tau O_2C_5C_4C_3 + \tau C_6C_5C_4O_3 + \tau O_4C_5C_4O_3 + \tau O_2C_5C_4O_3$                                                             | $\tau C_5C_4$                      | torsions                                                                                        |
| $\tau H_6C_3C_4C_5 + \tau C_2C_3C_4C_5 + \tau H_7C_3C_4C_5 + \tau H_6C_3C_4O_3 + \tau C_2C_3C_4O_3 + \tau H_7C_3C_4O_3$                                                             | $\tau C_3C_4$                      | torsions                                                                                        |
| $\tau C_1C_2C_3H_6 + \tau H_5C_2C_3H_6 + \tau H_4C_2C_3H_6 + \tau C_1C_2C_3C_4 + \tau H_5C_2C_3C_4 + \tau H_4C_2C_3C_4 + \tau C_1C_2C_3H_7 + \tau H_5C_2C_3H_7 + \tau H_4C_2C_3H_7$ | $\tau C_2C_3$                      | torsions                                                                                        |

Table S2 (continued)

| Vibration                                                                                                                                                                                                                                                                                                                                                                                                                                                                                | Definition                       |          |
|------------------------------------------------------------------------------------------------------------------------------------------------------------------------------------------------------------------------------------------------------------------------------------------------------------------------------------------------------------------------------------------------------------------------------------------------------------------------------------------|----------------------------------|----------|
| $\tau\text{H}_1\text{C}_1\text{C}_2\text{C}_3 + \tau\text{H}_3\text{C}_1\text{C}_2\text{C}_3 + \tau\text{H}_2\text{C}_1\text{C}_2\text{C}_3 + \tau\text{H}_1\text{C}_1\text{C}_2\text{H}_5 + \tau\text{H}_3\text{C}_1\text{C}_2\text{H}_5$<br>$+ \tau\text{H}_2\text{C}_1\text{C}_2\text{H}_5 + \tau\text{H}_1\text{C}_1\text{C}_2\text{H}_4 + \tau\text{H}_3\text{C}_1\text{C}_2\text{H}_4 + \tau\text{H}_2\text{C}_1\text{C}_2\text{H}_4$                                              | $\tau\text{C}_1\text{C}_2$       | torsions |
| $\tau\text{O}_6\text{C}_{10}\text{C}_{11}\text{C}_{12} + \tau\text{C}_9\text{C}_{10}\text{C}_{11}\text{C}_{12} + \tau\text{O}_6\text{C}_{10}\text{C}_{11}\text{O}_2 + \tau\text{C}_9\text{C}_{10}\text{C}_{11}\text{O}_2$<br>$+ \tau\text{O}_6\text{C}_{10}\text{C}_{11}\text{O}_5 + \tau\text{C}_9\text{C}_{10}\text{C}_{11}\text{O}_5$                                                                                                                                                 | $\tau\text{C}_{10}\text{C}_{11}$ | torsions |
| $\tau\text{O}_6\text{C}_{10}\text{C}_9\text{C}_8 + \tau\text{C}_{11}\text{C}_{10}\text{C}_9\text{C}_8 + \tau\text{O}_6\text{C}_{10}\text{C}_9\text{H}_{17} + \tau\text{C}_{11}\text{C}_{10}\text{C}_9\text{H}_{17}$<br>$+ \tau\text{O}_6\text{C}_{10}\text{C}_9\text{H}_{16} + \tau\text{C}_{11}\text{C}_{10}\text{C}_9\text{H}_{16}$                                                                                                                                                    | $\tau\text{C}_{10}\text{C}_9$    | torsions |
| $\tau\text{C}_7\text{C}_8\text{C}_9\text{C}_{10} + \tau\text{H}_{14}\text{C}_8\text{C}_9\text{C}_{10} + \tau\text{H}_{15}\text{C}_8\text{C}_9\text{C}_{10} + \tau\text{C}_7\text{C}_8\text{C}_9\text{H}_{17} + \tau\text{H}_{14}\text{C}_8\text{C}_9\text{H}_{17}$<br>$+ \tau\text{H}_{15}\text{C}_8\text{C}_9\text{H}_{17} + \tau\text{C}_7\text{C}_8\text{C}_9\text{H}_{16} + \tau\text{H}_{14}\text{C}_8\text{C}_9\text{H}_{16} + \tau\text{H}_{15}\text{C}_8\text{C}_9\text{H}_{16}$ | $\tau\text{C}_8\text{C}_9$       | torsions |
| $\tau\text{H}_{13}\text{C}_7\text{C}_8\text{H}_{14} + \tau\text{H}_{11}\text{C}_7\text{C}_8\text{H}_{14} + \tau\text{H}_{12}\text{C}_7\text{C}_8\text{H}_{14} + \tau\text{H}_{13}\text{C}_7\text{C}_8\text{H}_{15}$<br>$+ \tau\text{H}_{11}\text{C}_7\text{C}_8\text{H}_{15} + \tau\text{H}_{12}\text{C}_7\text{C}_8\text{H}_{15} + \tau\text{H}_{13}\text{C}_7\text{C}_8\text{C}_9 + \tau\text{H}_{11}\text{C}_7\text{C}_8\text{C}_9 + \tau\text{H}_{12}\text{C}_7\text{C}_8\text{C}_9$ | $\tau\text{C}_7\text{C}_8$       | torsions |

Table S3 Titration of pre-heated aqueous solutions of **5a hydrate** with KOH (Fig. 7). Details of preparing the solutions

| Sample                            | %KOH  | $c_{\text{KOH}}/10^{-5} \text{ mol}\cdot\text{dm}^{-3}$ |
|-----------------------------------|-------|---------------------------------------------------------|
| <b>II</b> <sup>a</sup>            | 0     | 0                                                       |
| <b>II</b> <sup>a</sup> + x KOH    | 2.50  | 3.08                                                    |
| <b>II</b> <sup>a</sup> + 2x KOH   | 5.00  | 6.16                                                    |
| <b>II</b> <sup>a</sup> + 3x KOH   | 7.50  | 9.23                                                    |
| <b>II</b> <sup>a</sup> + 4x KOH   | 10.00 | 12.31                                                   |
| <b>II</b> <sup>a</sup> + 4.5x KOH | 11.25 | 13.85                                                   |

<sup>a</sup> after heating up to 96°C for 30 min

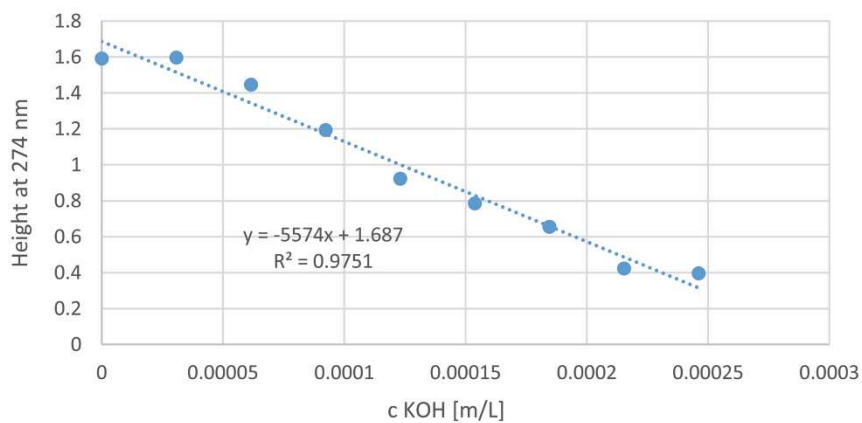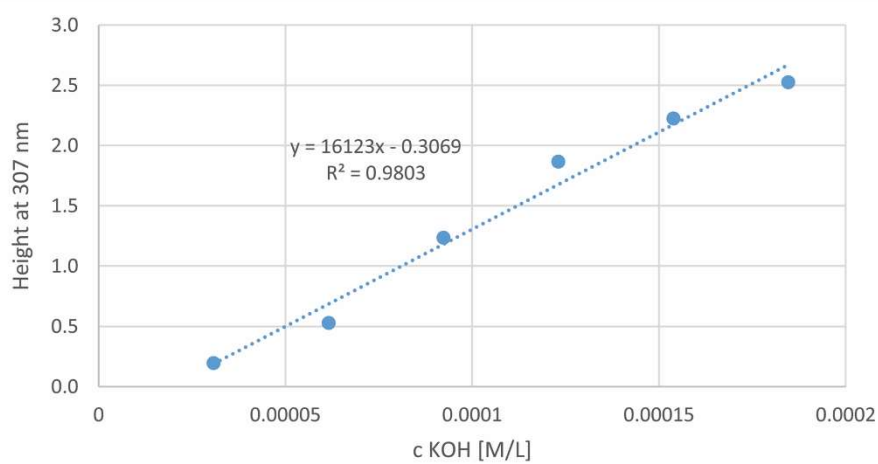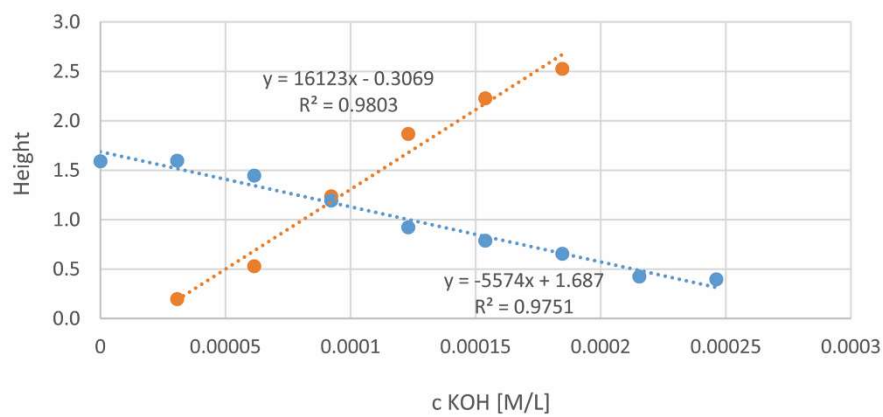

Fig. S8a (I) Regression curves for the acidic and the basic forms (**II** and **II'**) (Series I).

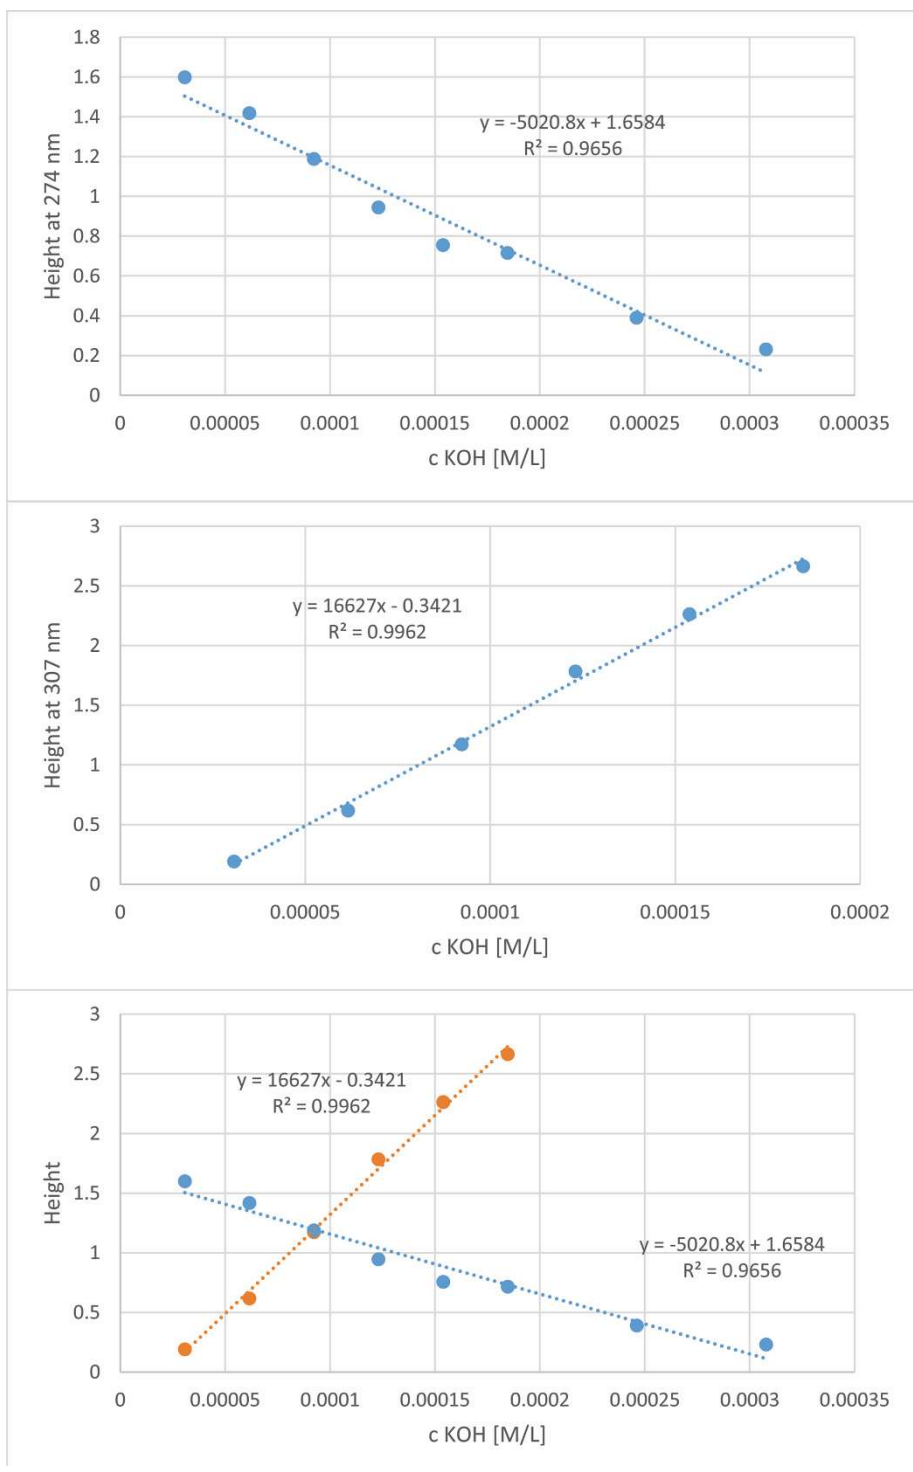

Fig. S8a (II) Regression curves for the acidic and the basic forms (**II** and **II'**) (Series II).

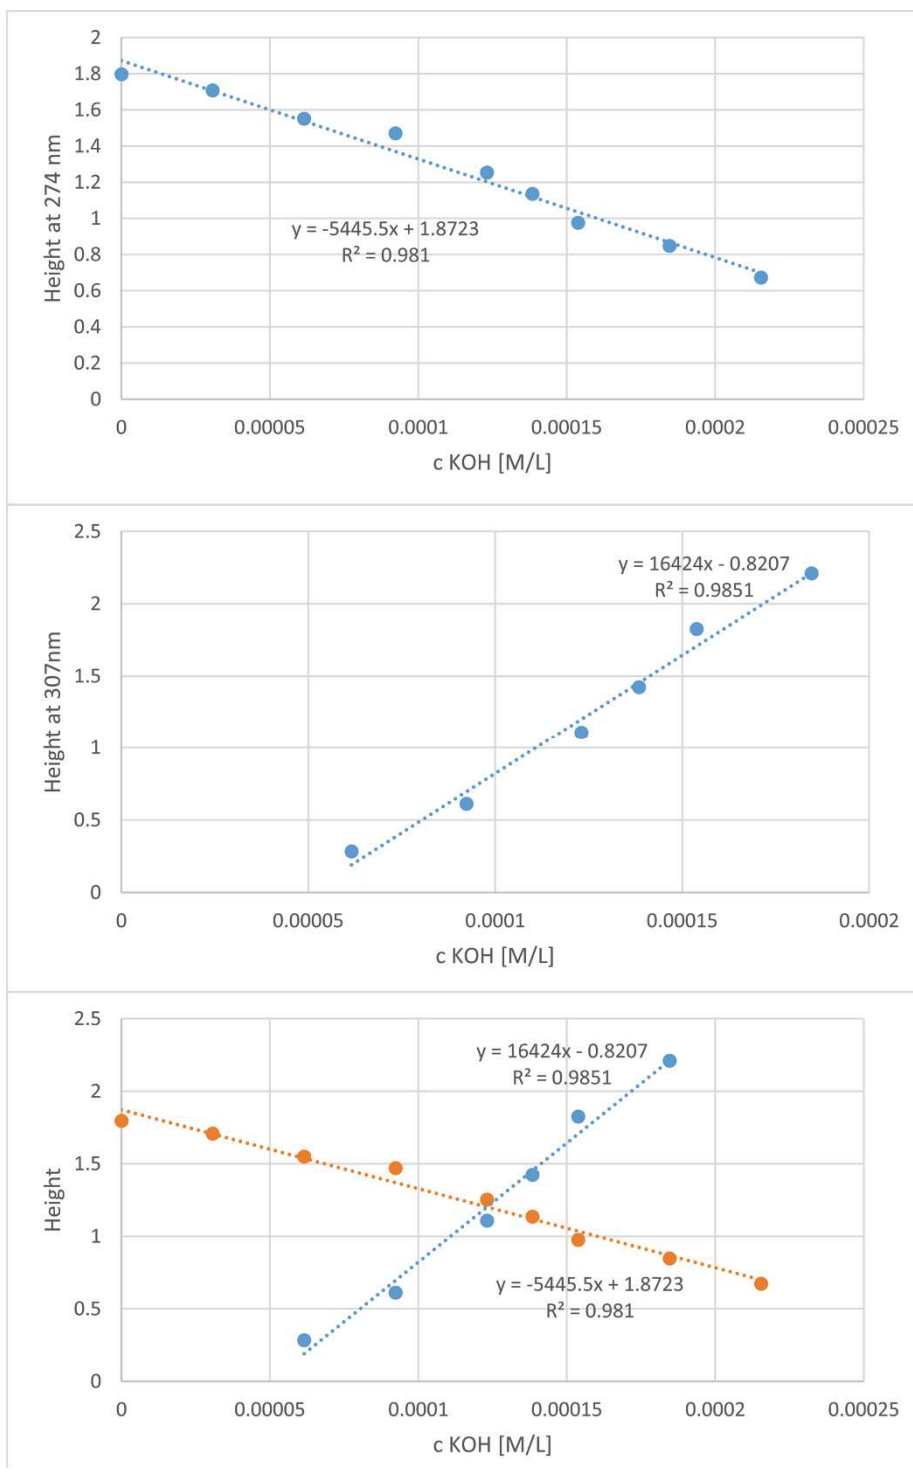

Fig. S8a (III) Regression curves for the acidic and the basic forms (**II** and **II'**) (Series III).



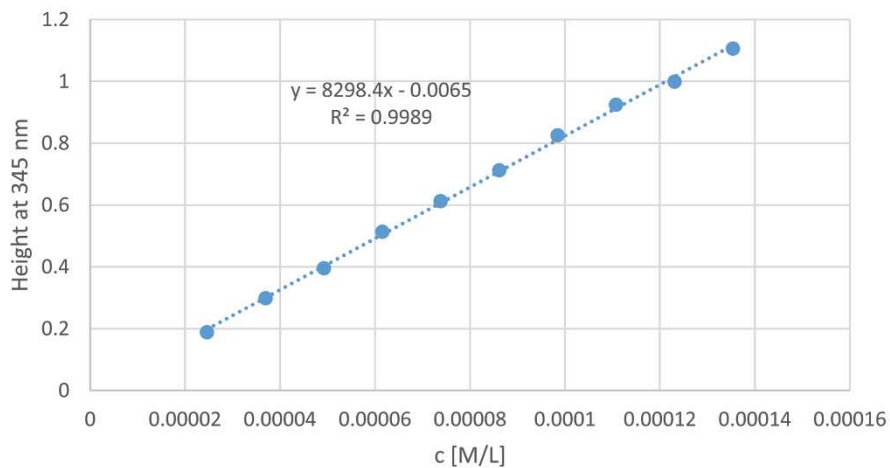

Fig. S8b (III) Regression curves for the dianionic form  $\text{II}^-$  (Series III).

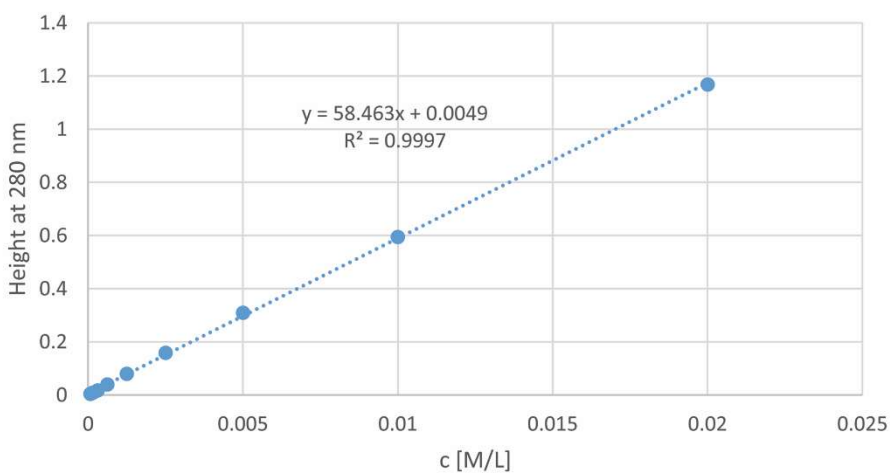

Fig. S8c (I) Regression curves for **5a hydrate** (Series I).

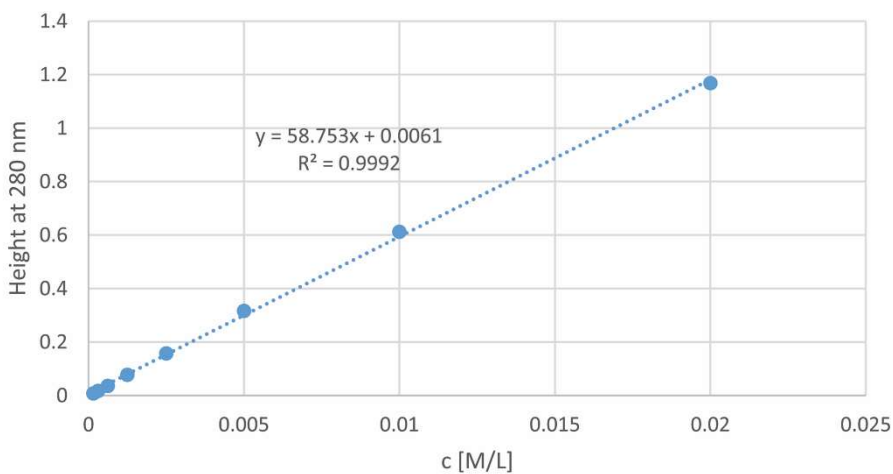

Fig. S8c (II) Regression curves for **5a hydrate** (Series II).

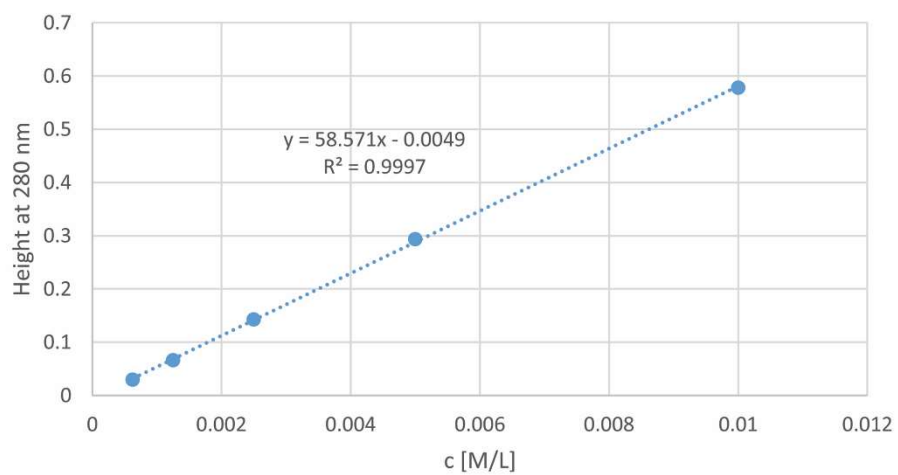

Fig. S8c (III) Regression curves for **5a hydrate** (Series III).

5a hydrate

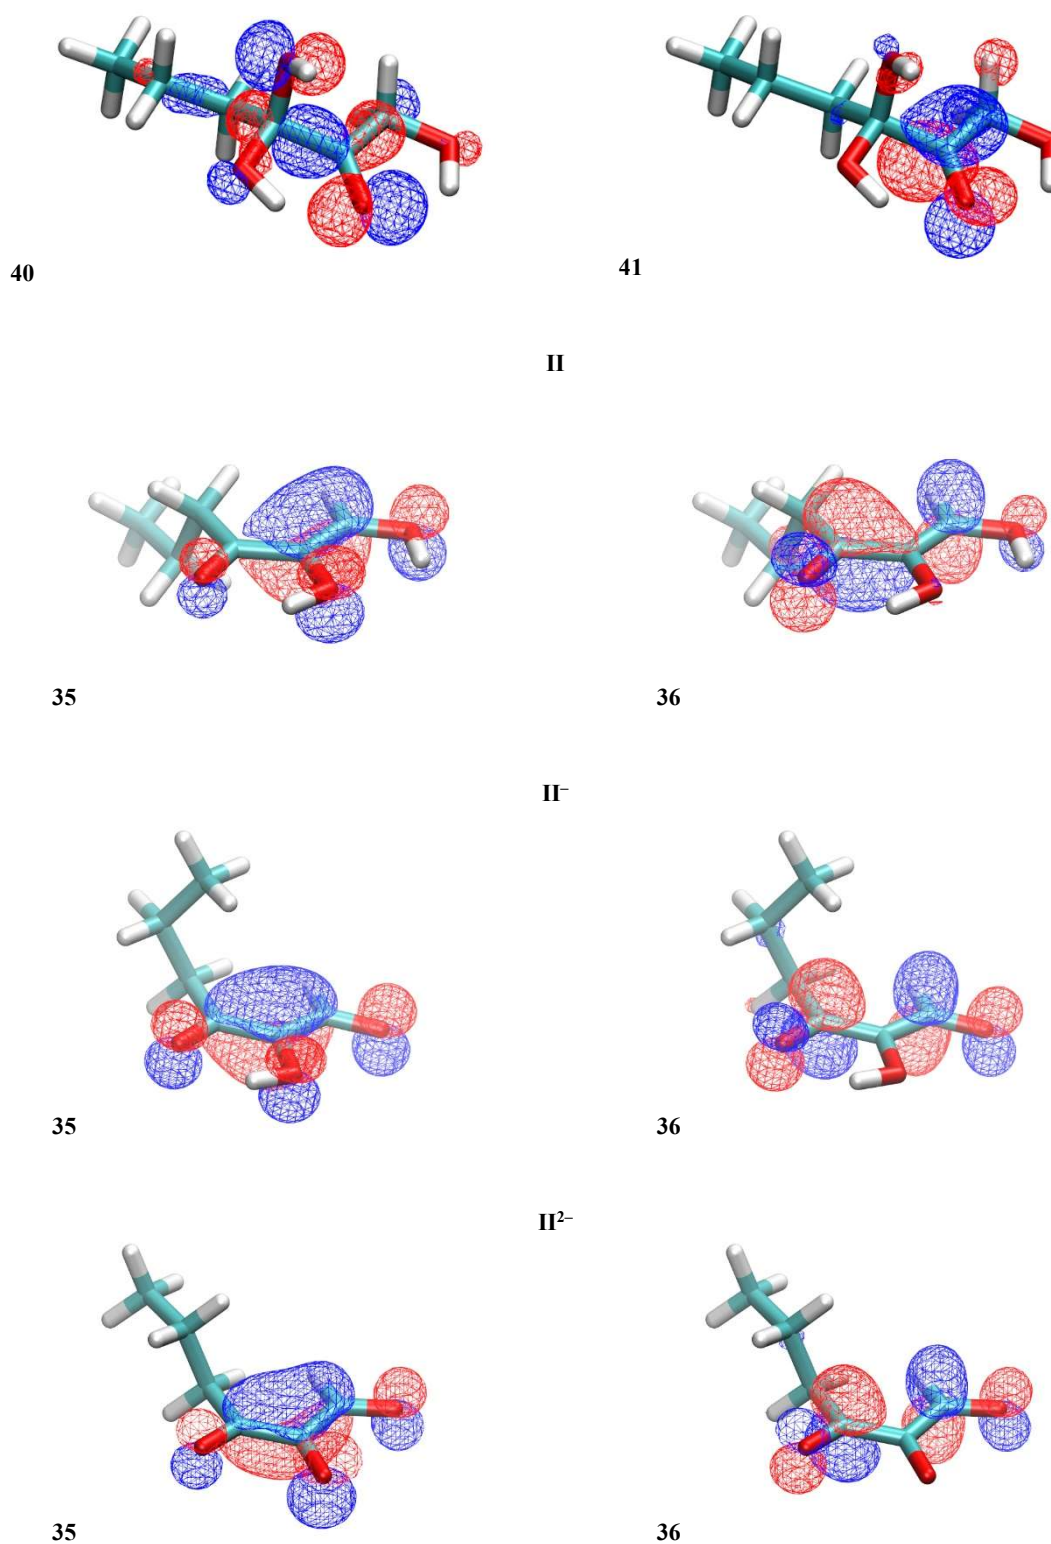

Fig. S9 Contours of key molecular KS orbitals (plotted at 0.05 a.u.) for intense low-energy electronic transitions of various forms of the compound II (5a hydrate, II, II<sup>-</sup>, and II<sup>2-</sup>).

$^{13}\text{C}$  NMR spectrum of **6a** in 50 mM Kpi (50 mM; T = 300 K; Bruker Avance III 600, 150 MHz) at pH > 7, after 3 h in air

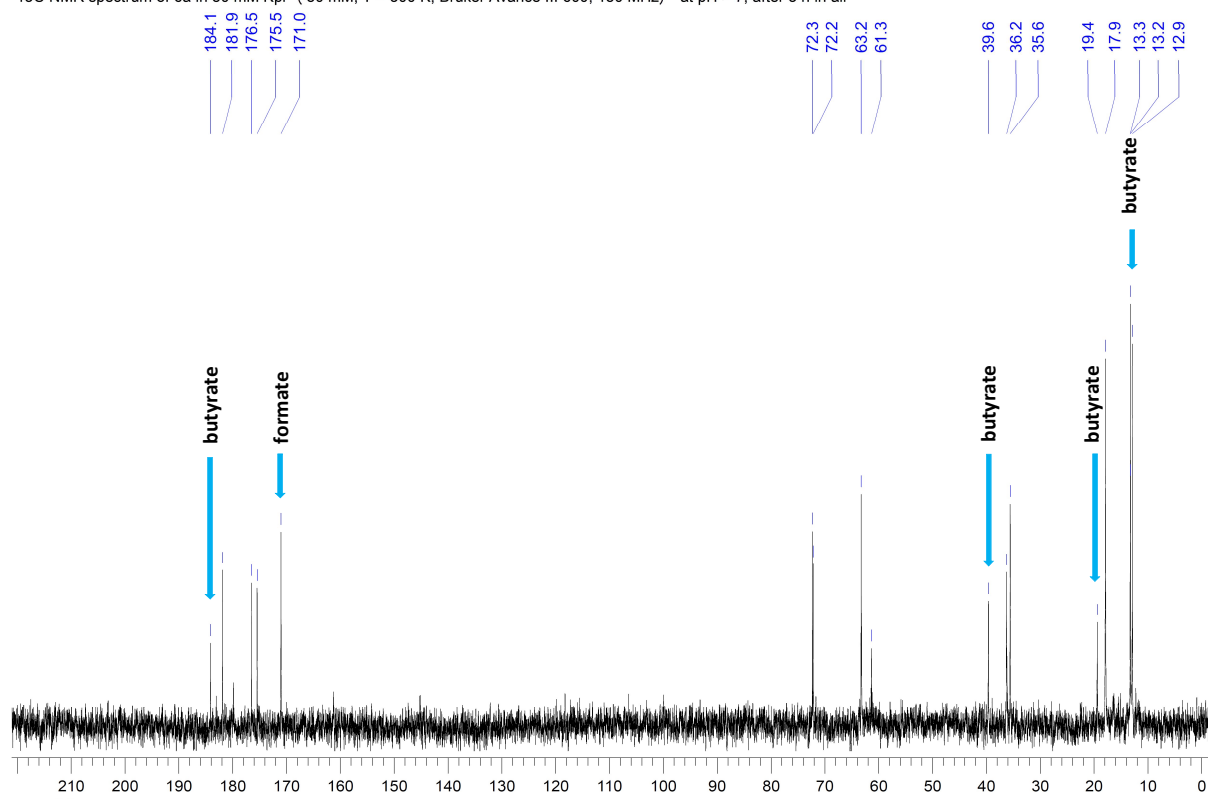

Fig. S10  $^{13}\text{C}$  NMR spectrum of **6a** ( $c = 50 \text{ mmol}\cdot\text{dm}^{-3}$ ) in Kpi ( $c = 50 \text{ mmol}\cdot\text{dm}^{-3}$ ), at pH > 7, after 3 h at 20°C in air. 10% v/v  $\text{D}_2\text{O}$  was added prior to the measurement. Apart from these from formate, also signals probably from butyrate are visible, but *not* from 2-oxopentanoate.

**<sup>13</sup>C NMR spectrum of 6a in 50 mM Kpi (70 mM; T = 300 K; Bruker Avance III 600, 150 MHz) after 3 h in air**

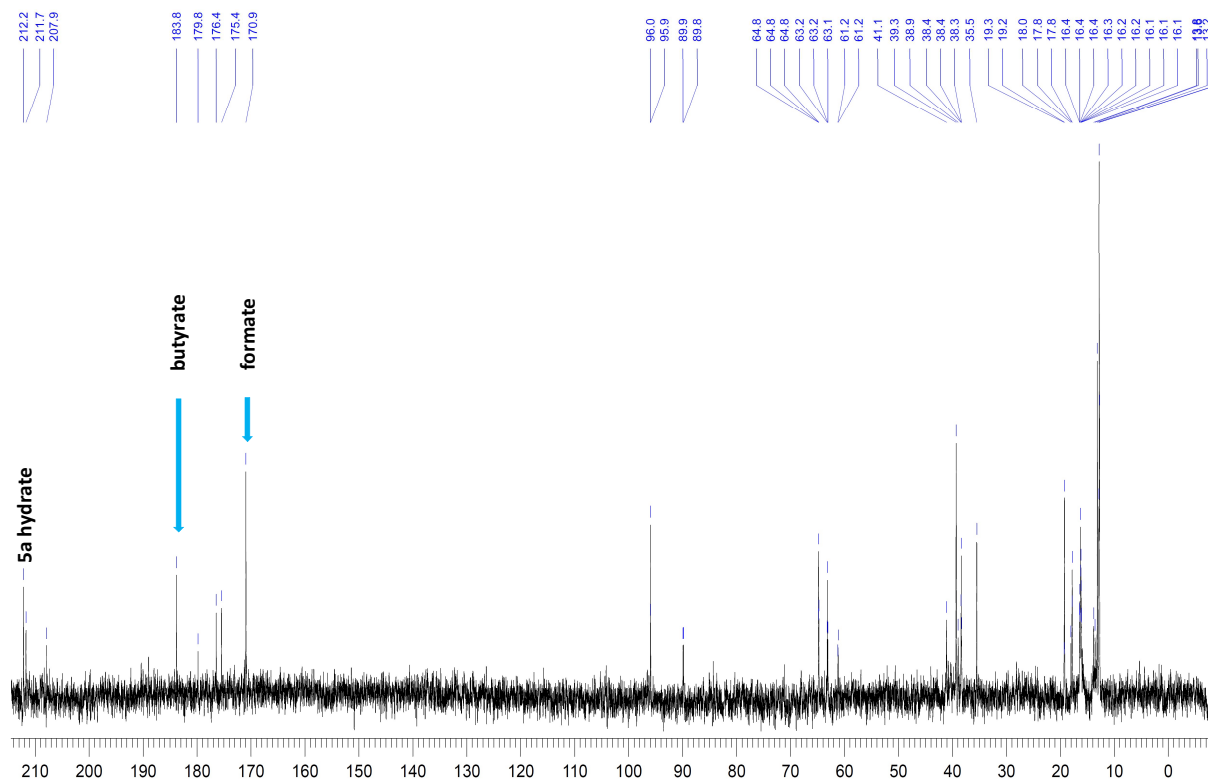

Fig. S11 <sup>13</sup>C NMR spectrum of **6a** ( $c = 70 \text{ mmol}\cdot\text{dm}^{-3}$ ) in Kpi; ( $c = 50 \text{ mmol}\cdot\text{dm}^{-3}$ ), after 3 h at 20°C in air. 10% v/v D<sub>2</sub>O was added prior to the measurement. Under such conditions the reaction could not be completed, however, apart from these from the substrate and formate, also a signal probably from butyrate is visible, but *not* from 2-oxopentanoate.
